# Supplementary material
Source: publisher figshare collection journal article supplement (https://acs.figshare.com/ndownloader/files/5100367)
Supplement: Supplementary file 1 [file 5100367]

data_jsm80


_audit_creation_method            SHELXL-97

_chemical_name_systematic

;

  ?

;

_chemical_name_common             ?

_chemical_melting_point           ?

_chemical_formula_moiety          ?

_chemical_formula_sum

  'C86 H102 Mn N8 Ni O7 S4'

_chemical_formula_weight          1601.65


loop_

  _atom_type_symbol

  _atom_type_description

  _atom_type_scat_dispersion_real

  _atom_type_scat_dispersion_imag

  _atom_type_scat_source

  'C'  'C'   0.0033   0.0016

  'International Tables Vol C Tables 4.2.6.8 and 6.1.1.4'

  'H'  'H'   0.0000   0.0000

  'International Tables Vol C Tables 4.2.6.8 and 6.1.1.4'

  'N'  'N'   0.0061   0.0033

  'International Tables Vol C Tables 4.2.6.8 and 6.1.1.4'

  'S'  'S'   0.1246   0.1234

  'International Tables Vol C Tables 4.2.6.8 and 6.1.1.4'

  'Mn'  'Mn'   0.3368   0.7283

  'International Tables Vol C Tables 4.2.6.8 and 6.1.1.4'

  'Ni'  'Ni'   0.3393   1.1124

  'International Tables Vol C Tables 4.2.6.8 and 6.1.1.4'

  'O'  'O'   0.0106   0.0060

  'International Tables Vol C Tables 4.2.6.8 and 6.1.1.4'


_symmetry_cell_setting            Triclinic

_symmetry_space_group_name_H-M    P-1


loop_

  _symmetry_equiv_pos_as_xyz

  'x, y, z'

  '-x, -y, -z'


_cell_length_a                    14.647(3)

_cell_length_b                    16.688(3)

_cell_length_c                    19.783(4)

_cell_angle_alpha                 90.842(3)

_cell_angle_beta                  98.920(3)

_cell_angle_gamma                 113.425(3)

_cell_volume                      4367.8(15)

_cell_formula_units_Z             2

_cell_measurement_temperature     100(2)

_cell_measurement_reflns_used     4701

_cell_measurement_theta_min       2.48

_cell_measurement_theta_max       27.36


_exptl_crystal_description        ?

_exptl_crystal_colour             ?

_exptl_crystal_size_max           ?

_exptl_crystal_size_mid           ?

_exptl_crystal_size_min           ?

_exptl_crystal_density_meas       0

_exptl_crystal_density_diffrn     1.218

_exptl_crystal_density_method     'not measured'

_exptl_crystal_F_000              1694

_exptl_absorpt_coefficient_mu     0.511

_exptl_absorpt_correction_type    empirical

_exptl_absorpt_correction_T_min   0.7784

_exptl_absorpt_correction_T_max   0.9241

_exptl_absorpt_process_details    sadabs


_exptl_special_details

;

  ?

;


_diffrn_ambient_temperature       100(2)

_diffrn_radiation_wavelength      0.71073

_diffrn_radiation_type            MoK\a

_diffrn_radiation_source          'fine-focus sealed tube'

_diffrn_radiation_monochromator   graphite

_diffrn_measurement_device_type   'CCD area detector'

_diffrn_measurement_method        'phi and omega scans'

_diffrn_detector_area_resol_mean  ?

_diffrn_standards_number          ?

_diffrn_standards_interval_count  ?

_diffrn_standards_interval_time   ?

_diffrn_standards_decay_%         ?

_diffrn_reflns_number             31139

_diffrn_reflns_av_R_equivalents   0.1061

_diffrn_reflns_av_sigmaI/netI     0.1997

_diffrn_reflns_limit_h_min        -17

_diffrn_reflns_limit_h_max        17

_diffrn_reflns_limit_k_min        -19

_diffrn_reflns_limit_k_max        19

_diffrn_reflns_limit_l_min        -23

_diffrn_reflns_limit_l_max        23

_diffrn_reflns_theta_min          1.33

_diffrn_reflns_theta_max          25.00

_reflns_number_total              15214

_reflns_number_gt                 7075

_reflns_threshold_expression      >2sigma(I)


_computing_data_collection        'Bruker SMART'

_computing_cell_refinement        'Bruker SMART'

_computing_data_reduction         'Bruker SAINT'

_computing_structure_solution     'SHELXS-97 (Sheldrick, 1990)'

_computing_structure_refinement   'SHELXL-97 (Sheldrick, 1997)'

_computing_molecular_graphics     'Bruker SHELXTL'

_computing_publication_material   'Bruker SHELXTL'


_refine_special_details

;

  Refinement of F^2^ against ALL reflections.  The weighted R-factor wR and

  goodness of fit S are based on F^2^, conventional R-factors R are based

  on F, with F set to zero for negative F^2^. The threshold expression of

  F^2^ > 2sigma(F^2^) is used only for calculating R-factors(gt) etc. and is

  not relevant to the choice of reflections for refinement.  R-factors based

  on F^2^ are statistically about twice as large as those based on F, and R-

  factors based on ALL data will be even larger.

;


_refine_ls_structure_factor_coef  Fsqd

_refine_ls_matrix_type            full

_refine_ls_weighting_scheme       calc

_refine_ls_weighting_details

  'calc w=1/[\s^2^(Fo^2^)+(0.0680P)^2^+0.0000P] where P=(Fo^2^+2Fc^2^)/3'

_atom_sites_solution_primary      direct

_atom_sites_solution_secondary    difmap

_atom_sites_solution_hydrogens    geom

_refine_ls_hydrogen_treatment     mixed

_refine_ls_extinction_method      none

_refine_ls_extinction_coef        ?

_refine_ls_number_reflns          15214

_refine_ls_number_parameters      967

_refine_ls_number_restraints      0

_refine_ls_R_factor_all           0.1803

_refine_ls_R_factor_gt            0.0756

_refine_ls_wR_factor_ref          0.1890

_refine_ls_wR_factor_gt           0.1522

_refine_ls_goodness_of_fit_ref    1.017

_refine_ls_restrained_S_all       1.017

_refine_ls_shift/su_max           0.240

_refine_ls_shift/su_mean          0.003


loop_

  _atom_site_label

  _atom_site_type_symbol

  _atom_site_fract_x

  _atom_site_fract_y

  _atom_site_fract_z

  _atom_site_U_iso_or_equiv

  _atom_site_adp_type

  _atom_site_occupancy

  _atom_site_symmetry_multiplicity

  _atom_site_calc_flag

  _atom_site_refinement_flags

  _atom_site_disorder_assembly

  _atom_site_disorder_group

Ni2 Ni 0.5000 0.5000 0.5000 0.0241(3) Uani 1 2 d S . .

Ni1 Ni 0.0000 0.0000 0.0000 0.0340(4) Uani 1 2 d S . .

Mn1 Mn 0.28103(7) 0.43780(6) 0.30273(5) 0.0171(2) Uani 1 1 d . . .

S1 S -0.06592(15) 0.00490(14) 0.08894(10) 0.0439(5) Uani 1 1 d . . .

S2 S 0.07368(14) 0.14048(13) 0.00322(10) 0.0380(5) Uani 1 1 d . . .

S3 S 0.48222(13) 0.49486(11) 0.60674(9) 0.0271(4) Uani 1 1 d . . .

S4 S 0.46312(12) 0.36174(11) 0.48838(9) 0.0249(4) Uani 1 1 d . . .

O1 O 0.1756(3) 0.5808(3) 0.7227(2) 0.0343(12) Uani 1 1 d . . .

H1A H 0.1184 0.5477 0.7274 0.051 Uiso 1 1 calc R . .

O2 O 0.3933(3) 0.9834(3) 0.1754(3) 0.0439(14) Uani 1 1 d . . .

H2A H 0.4527 1.0181 0.1844 0.066 Uiso 1 1 calc R . .

O3 O 0.3809(3) 0.2611(3) -0.1084(2) 0.0274(11) Uani 1 1 d . . .

H3A H 0.3538 0.2791 -0.1405 0.041 Uiso 1 1 calc R . .

O4 O 0.0980(3) -0.1279(3) 0.3951(3) 0.0420(14) Uani 1 1 d . . .

H4A H 0.0361 -0.1520 0.3893 0.063 Uiso 1 1 calc R . .

O5 O 0.1267(3) 0.4063(3) 0.2535(2) 0.0232(11) Uani 1 1 d . . .

O303 O -0.0571(4) 0.3117(3) 0.3015(3) 0.0449(14) Uani 1 1 d . . .

H30D H -0.0053 0.3420 0.2874 0.067 Uiso 1 1 calc R . .

O304 O 0.0759(13) 0.4970(8) 0.1452(6) 0.283(8) Uani 1 1 d . . .

N1 N 0.2431(4) 0.3794(3) 0.3876(2) 0.0172(12) Uani 1 1 d . . .

N2 N 0.3006(3) 0.5518(3) 0.3508(3) 0.0155(12) Uani 1 1 d . . .

N3 N 0.3329(4) 0.4989(3) 0.2214(2) 0.0175(12) Uani 1 1 d . . .

N4 N 0.2846(4) 0.3286(3) 0.2610(3) 0.0174(12) Uani 1 1 d . . .

N5 N -0.0856(5) 0.1642(5) 0.2129(4) 0.063(2) Uani 1 1 d . . .

N6 N 0.0872(5) 0.3417(5) 0.0969(5) 0.091(3) Uani 1 1 d . . .

N7 N 0.3907(4) 0.3272(4) 0.7347(3) 0.0345(15) Uani 1 1 d . . .

N8 N 0.3814(5) 0.1612(4) 0.5824(3) 0.0385(16) Uani 1 1 d . . .

C1 C 0.2375(4) 0.4161(4) 0.4497(3) 0.0143(14) Uani 1 1 d . . .

C2 C 0.2514(4) 0.5038(4) 0.4629(3) 0.0158(14) Uani 1 1 d . . .

C3 C 0.2827(4) 0.5672(4) 0.4157(3) 0.0195(15) Uani 1 1 d . . .

C4 C 0.2952(4) 0.6564(4) 0.4265(3) 0.0201(15) Uani 1 1 d . . .

H4B H 0.2881 0.6829 0.4659 0.024 Uiso 1 1 calc R . .

C5 C 0.3192(4) 0.6941(4) 0.3683(3) 0.0194(15) Uani 1 1 d . . .

H5B H 0.3319 0.7521 0.3606 0.023 Uiso 1 1 calc R . .

C6 C 0.3219(4) 0.6312(4) 0.3208(3) 0.0173(15) Uani 1 1 d . . .

C7 C 0.3422(4) 0.6465(4) 0.2549(3) 0.0201(15) Uani 1 1 d . . .

C8 C 0.3534(5) 0.5864(4) 0.2106(3) 0.0224(16) Uani 1 1 d . . .

C9 C 0.3899(5) 0.6062(4) 0.1479(3) 0.0263(17) Uani 1 1 d . . .

H9A H 0.4080 0.6600 0.1292 0.032 Uiso 1 1 calc R . .

C10 C 0.3938(5) 0.5332(4) 0.1200(3) 0.0266(17) Uani 1 1 d . . .

H10A H 0.4172 0.5285 0.0797 0.032 Uiso 1 1 calc R . .

C11 C 0.3551(4) 0.4644(4) 0.1642(3) 0.0180(15) Uani 1 1 d . . .

C12 C 0.3360(4) 0.3768(4) 0.1490(3) 0.0212(16) Uani 1 1 d . . .

C13 C 0.2981(5) 0.3137(4) 0.1946(3) 0.0199(15) Uani 1 1 d . . .

C14 C 0.2641(5) 0.2208(4) 0.1788(4) 0.0280(17) Uani 1 1 d . . .

H14A H 0.2628 0.1933 0.1372 0.034 Uiso 1 1 calc R . .

C15 C 0.2346(5) 0.1810(4) 0.2348(3) 0.0244(16) Uani 1 1 d . . .

H15A H 0.2104 0.1210 0.2391 0.029 Uiso 1 1 calc R . .

C16 C 0.2462(4) 0.2452(4) 0.2862(3) 0.0163(15) Uani 1 1 d . . .

C17 C 0.2213(4) 0.2301(4) 0.3503(3) 0.0173(15) Uani 1 1 d . . .

C18 C 0.2225(4) 0.2918(4) 0.3978(3) 0.0172(15) Uani 1 1 d . . .

C19 C 0.2061(4) 0.2759(4) 0.4671(3) 0.0209(15) Uani 1 1 d . . .

H19A H 0.1912 0.2228 0.4867 0.025 Uiso 1 1 calc R . .

C20 C 0.2162(4) 0.3523(4) 0.4986(3) 0.0187(15) Uani 1 1 d . . .

H20A H 0.2103 0.3614 0.5439 0.022 Uiso 1 1 calc R . .

C21 C 0.2322(5) 0.5285(4) 0.5301(3) 0.0193(15) Uani 1 1 d . . .

C22 C 0.1381(4) 0.4795(4) 0.5498(3) 0.0169(14) Uani 1 1 d . . .

H22A H 0.0874 0.4371 0.5182 0.020 Uiso 1 1 calc R . .

C23 C 0.1190(4) 0.4926(4) 0.6144(3) 0.0180(15) Uani 1 1 d . . .

C24 C 0.1930(5) 0.5614(4) 0.6587(3) 0.0234(16) Uani 1 1 d . . .

C25 C 0.2887(4) 0.6128(4) 0.6420(3) 0.0172(15) Uani 1 1 d . . .

C26 C 0.3043(5) 0.5947(4) 0.5773(3) 0.0176(14) Uani 1 1 d . . .

H26A H 0.3660 0.6284 0.5646 0.021 Uiso 1 1 calc R . .

C27 C 0.0228(5) 0.4243(4) 0.6380(3) 0.0221(16) Uani 1 1 d . . .

C28 C -0.0427(5) 0.4667(4) 0.6637(3) 0.0298(17) Uani 1 1 d . . .

H28A H -0.1001 0.4223 0.6780 0.045 Uiso 1 1 calc R . .

H28B H -0.0653 0.4955 0.6274 0.045 Uiso 1 1 calc R . .

H28C H -0.0035 0.5088 0.7019 0.045 Uiso 1 1 calc R . .

C29 C 0.0587(5) 0.3782(4) 0.6959(4) 0.0360(19) Uani 1 1 d . . .

H29A H 0.0012 0.3358 0.7117 0.054 Uiso 1 1 calc R . .

H29B H 0.1007 0.4207 0.7332 0.054 Uiso 1 1 calc R . .

H29C H 0.0968 0.3492 0.6792 0.054 Uiso 1 1 calc R . .

C30 C -0.0436(5) 0.3551(4) 0.5799(3) 0.0290(17) Uani 1 1 d . . .

H30A H -0.1017 0.3140 0.5960 0.043 Uiso 1 1 calc R . .

H30B H -0.0058 0.3248 0.5647 0.043 Uiso 1 1 calc R . .

H30C H -0.0652 0.3829 0.5423 0.043 Uiso 1 1 calc R . .

C31 C 0.3750(5) 0.6805(4) 0.6943(3) 0.0241(16) Uani 1 1 d . . .

C32 C 0.4713(5) 0.7251(4) 0.6647(4) 0.0350(19) Uani 1 1 d . . .

H32A H 0.4917 0.6816 0.6482 0.052 Uiso 1 1 calc R . .

H32B H 0.5239 0.7642 0.6997 0.052 Uiso 1 1 calc R . .

H32C H 0.4589 0.7577 0.6274 0.052 Uiso 1 1 calc R . .

C33 C 0.3470(5) 0.7534(4) 0.7198(4) 0.0370(19) Uani 1 1 d . . .

H33A H 0.2867 0.7281 0.7393 0.055 Uiso 1 1 calc R . .

H33B H 0.3356 0.7857 0.6819 0.055 Uiso 1 1 calc R . .

H33C H 0.4013 0.7923 0.7540 0.055 Uiso 1 1 calc R . .

C34 C 0.3997(5) 0.6326(4) 0.7555(3) 0.0360(19) Uani 1 1 d . . .

H34A H 0.4172 0.5869 0.7394 0.054 Uiso 1 1 calc R . .

H34B H 0.3419 0.6077 0.7775 0.054 Uiso 1 1 calc R . .

H34C H 0.4557 0.6734 0.7876 0.054 Uiso 1 1 calc R . .

C41 C 0.3575(5) 0.7353(4) 0.2311(3) 0.0213(15) Uani 1 1 d . . .

C42 C 0.2774(5) 0.7517(4) 0.1998(3) 0.0295(17) Uani 1 1 d . . .

H42A H 0.2135 0.7060 0.1921 0.035 Uiso 1 1 calc R . .

C43 C 0.2871(5) 0.8336(4) 0.1788(4) 0.0283(17) Uani 1 1 d . . .

C44 C 0.3854(5) 0.9003(4) 0.1915(3) 0.0276(17) Uani 1 1 d . . .

C45 C 0.4705(5) 0.8859(4) 0.2190(3) 0.0220(16) Uani 1 1 d . . .

C46 C 0.4548(4) 0.8018(4) 0.2390(3) 0.0191(15) Uani 1 1 d . . .

H46A H 0.5100 0.7901 0.2579 0.023 Uiso 1 1 calc R . .

C47 C 0.1971(5) 0.8499(5) 0.1407(4) 0.044(2) Uani 1 1 d . . .

C48 C 0.2163(6) 0.8799(5) 0.0695(4) 0.061(3) Uani 1 1 d . . .

H48A H 0.2755 0.9338 0.0743 0.091 Uiso 1 1 calc R . .

H48B H 0.1591 0.8890 0.0459 0.091 Uiso 1 1 calc R . .

H48C H 0.2262 0.8359 0.0436 0.091 Uiso 1 1 calc R . .

C49 C 0.1744(6) 0.9165(6) 0.1788(5) 0.068(3) Uani 1 1 d . . .

H49A H 0.2331 0.9709 0.1870 0.102 Uiso 1 1 calc R . .

H49B H 0.1565 0.8957 0.2219 0.102 Uiso 1 1 calc R . .

H49C H 0.1192 0.9253 0.1520 0.102 Uiso 1 1 calc R . .

C50 C 0.0993(5) 0.7641(5) 0.1285(5) 0.062(3) Uani 1 1 d . . .

H50A H 0.0442 0.7759 0.1048 0.092 Uiso 1 1 calc R . .

H50B H 0.0841 0.7424 0.1719 0.092 Uiso 1 1 calc R . .

H50C H 0.1091 0.7211 0.1013 0.092 Uiso 1 1 calc R . .

C51 C 0.5817(5) 0.9572(4) 0.2311(3) 0.0269(17) Uani 1 1 d . . .

C52 C 0.5989(5) 1.0090(4) 0.3009(3) 0.0375(19) Uani 1 1 d . . .

H52A H 0.5849 0.9691 0.3362 0.056 Uiso 1 1 calc R . .

H52B H 0.5547 1.0390 0.2981 0.056 Uiso 1 1 calc R . .

H52C H 0.6678 1.0510 0.3117 0.056 Uiso 1 1 calc R . .

C53 C 0.6036(5) 1.0191(4) 0.1739(3) 0.0330(18) Uani 1 1 d . . .

H53A H 0.5924 0.9859 0.1311 0.050 Uiso 1 1 calc R . .

H53B H 0.6726 1.0610 0.1841 0.050 Uiso 1 1 calc R . .

H53C H 0.5595 1.0492 0.1705 0.050 Uiso 1 1 calc R . .

C54 C 0.6567(5) 0.9145(4) 0.2361(4) 0.0336(19) Uani 1 1 d . . .

H54A H 0.6470 0.8818 0.1933 0.050 Uiso 1 1 calc R . .

H54B H 0.6461 0.8758 0.2723 0.050 Uiso 1 1 calc R . .

H54C H 0.7243 0.9591 0.2458 0.050 Uiso 1 1 calc R . .

C61 C 0.3488(4) 0.3490(4) 0.0809(3) 0.0186(15) Uani 1 1 d . . .

C62 C 0.3029(4) 0.3682(4) 0.0205(3) 0.0214(15) Uani 1 1 d . . .

H62A H 0.2651 0.4011 0.0237 0.026 Uiso 1 1 calc R . .

C63 C 0.3097(5) 0.3414(4) -0.0443(3) 0.0234(16) Uani 1 1 d . . .

C64 C 0.3651(5) 0.2902(4) -0.0471(3) 0.0213(15) Uani 1 1 d . . .

C65 C 0.4083(4) 0.2634(4) 0.0120(3) 0.0187(15) Uani 1 1 d . . .

C66 C 0.4017(5) 0.2963(4) 0.0748(3) 0.0233(16) Uani 1 1 d . . .

H66A H 0.4338 0.2829 0.1146 0.028 Uiso 1 1 calc R . .

C67 C 0.2568(5) 0.3659(4) -0.1084(3) 0.0264(16) Uani 1 1 d . . .

C68 C 0.1878(6) 0.4095(5) -0.0897(4) 0.041(2) Uani 1 1 d . . .

H68A H 0.2274 0.4611 -0.0592 0.062 Uiso 1 1 calc R . .

H68B H 0.1362 0.3692 -0.0676 0.062 Uiso 1 1 calc R . .

H68C H 0.1570 0.4254 -0.1307 0.062 Uiso 1 1 calc R . .

C69 C 0.3348(5) 0.4334(4) -0.1457(4) 0.038(2) Uani 1 1 d . . .

H69A H 0.3802 0.4095 -0.1581 0.057 Uiso 1 1 calc R . .

H69B H 0.3723 0.4860 -0.1158 0.057 Uiso 1 1 calc R . .

H69C H 0.3003 0.4468 -0.1864 0.057 Uiso 1 1 calc R . .

C70 C 0.1880(5) 0.2842(4) -0.1584(3) 0.0357(19) Uani 1 1 d . . .

H70A H 0.2280 0.2549 -0.1718 0.054 Uiso 1 1 calc R . .

H70B H 0.1574 0.3022 -0.1984 0.054 Uiso 1 1 calc R . .

H70C H 0.1362 0.2448 -0.1359 0.054 Uiso 1 1 calc R . .

C71 C 0.4515(5) 0.1921(5) 0.0097(3) 0.0299(18) Uani 1 1 d . . .

C72 C 0.5364(5) 0.2151(4) -0.0337(3) 0.0337(18) Uani 1 1 d . . .

H72A H 0.5602 0.1692 -0.0333 0.051 Uiso 1 1 calc R . .

H72B H 0.5911 0.2692 -0.0146 0.051 Uiso 1 1 calc R . .

H72C H 0.5104 0.2212 -0.0800 0.051 Uiso 1 1 calc R . .

C73 C 0.4966(6) 0.1785(5) 0.0804(4) 0.041(2) Uani 1 1 d . . .

H73A H 0.5225 0.1344 0.0768 0.061 Uiso 1 1 calc R . .

H73B H 0.4453 0.1600 0.1087 0.061 Uiso 1 1 calc R . .

H73C H 0.5504 0.2325 0.1008 0.061 Uiso 1 1 calc R . .

C74 C 0.3638(6) 0.1058(4) -0.0210(4) 0.0366(19) Uani 1 1 d . . .

H74A H 0.3882 0.0605 -0.0232 0.055 Uiso 1 1 calc R . .

H74B H 0.3354 0.1132 -0.0664 0.055 Uiso 1 1 calc R . .

H74C H 0.3128 0.0898 0.0074 0.055 Uiso 1 1 calc R . .

C81 C 0.1896(4) 0.1371(4) 0.3694(3) 0.0183(15) Uani 1 1 d . . .

C82 C 0.2597(5) 0.1014(4) 0.3876(3) 0.0224(16) Uani 1 1 d . . .

H82A H 0.3281 0.1376 0.3923 0.027 Uiso 1 1 calc R . .

C83 C 0.2323(5) 0.0143(4) 0.3991(3) 0.0222(16) Uani 1 1 d . . .

C84 C 0.1277(5) -0.0384(4) 0.3906(3) 0.0264(17) Uani 1 1 d . . .

C85 C 0.0534(5) -0.0049(4) 0.3762(3) 0.0236(16) Uani 1 1 d . . .

C86 C 0.0871(4) 0.0840(4) 0.3658(3) 0.0201(15) Uani 1 1 d . . .

H86A H 0.0400 0.1085 0.3562 0.024 Uiso 1 1 calc R . .

C87 C 0.3118(5) -0.0232(4) 0.4189(4) 0.0297(18) Uani 1 1 d . . .

C88 C 0.4193(5) 0.0498(4) 0.4308(4) 0.0361(19) Uani 1 1 d . . .

H88A H 0.4258 0.0916 0.4671 0.054 Uiso 1 1 calc R . .

H88B H 0.4315 0.0785 0.3895 0.054 Uiso 1 1 calc R . .

H88C H 0.4675 0.0246 0.4434 0.054 Uiso 1 1 calc R . .

C89 C 0.3092(6) -0.0869(5) 0.3608(5) 0.060(3) Uani 1 1 d . . .

H89A H 0.2434 -0.1342 0.3509 0.090 Uiso 1 1 calc R . .

H89B H 0.3592 -0.1098 0.3748 0.090 Uiso 1 1 calc R . .

H89C H 0.3233 -0.0563 0.3203 0.090 Uiso 1 1 calc R . .

C90 C 0.2989(5) -0.0663(5) 0.4874(4) 0.059(3) Uani 1 1 d . . .

H90A H 0.2328 -0.1129 0.4826 0.088 Uiso 1 1 calc R . .

H90B H 0.3067 -0.0232 0.5231 0.088 Uiso 1 1 calc R . .

H90C H 0.3491 -0.0895 0.4990 0.088 Uiso 1 1 calc R . .

C91 C -0.0619(5) -0.0616(4) 0.3689(3) 0.0268(17) Uani 1 1 d . . .

C92 C -0.0987(5) -0.1201(5) 0.3025(4) 0.045(2) Uani 1 1 d . . .

H92A H -0.0621 -0.1567 0.3023 0.068 Uiso 1 1 calc R . .

H92B H -0.0879 -0.0845 0.2644 0.068 Uiso 1 1 calc R . .

H92C H -0.1695 -0.1561 0.2986 0.068 Uiso 1 1 calc R . .

C93 C -0.0862(5) -0.1162(5) 0.4308(4) 0.042(2) Uani 1 1 d . . .

H93A H -0.0515 -0.1546 0.4340 0.063 Uiso 1 1 calc R . .

H93B H -0.1578 -0.1504 0.4249 0.063 Uiso 1 1 calc R . .

H93C H -0.0646 -0.0778 0.4721 0.063 Uiso 1 1 calc R . .

C94 C -0.1209(5) -0.0036(4) 0.3683(4) 0.0377(19) Uani 1 1 d . . .

H94A H -0.1091 0.0324 0.3305 0.057 Uiso 1 1 calc R . .

H94B H -0.0988 0.0331 0.4106 0.057 Uiso 1 1 calc R . .

H94C H -0.1918 -0.0399 0.3636 0.057 Uiso 1 1 calc R . .

C95 C -0.0609(6) 0.1416(5) 0.1665(5) 0.049(2) Uani 1 1 d . . .

C96 C -0.0282(5) 0.1151(5) 0.1088(4) 0.040(2) Uani 1 1 d . . .

C97 C 0.0326(5) 0.1751(5) 0.0705(4) 0.0369(19) Uani 1 1 d . . .

C98 C 0.0636(6) 0.2679(6) 0.0850(5) 0.057(3) Uani 1 1 d . . .

C99 C 0.4149(5) 0.3539(4) 0.6840(4) 0.0253(17) Uani 1 1 d . . .

C100 C 0.4439(5) 0.3847(4) 0.6194(4) 0.0254(16) Uani 1 1 d . . .

C101 C 0.4378(5) 0.3278(4) 0.5670(3) 0.0223(16) Uani 1 1 d . . .

C102 C 0.4058(5) 0.2348(5) 0.5757(3) 0.0265(17) Uani 1 1 d . . .

C301 C -0.1190(6) 0.2362(6) 0.4006(4) 0.058(2) Uani 1 1 d . . .

H30E H -0.0962 0.2250 0.4462 0.087 Uiso 1 1 calc R . .

H30F H -0.1555 0.1816 0.3730 0.087 Uiso 1 1 calc R . .

H30G H -0.1624 0.2664 0.4024 0.087 Uiso 1 1 calc R . .

C302 C -0.0311(6) 0.2907(5) 0.3702(4) 0.052(2) Uani 1 1 d . . .

H30H H 0.0064 0.3449 0.3992 0.062 Uiso 1 1 calc R . .

H30I H 0.0130 0.2602 0.3696 0.062 Uiso 1 1 calc R . .


loop_

  _atom_site_aniso_label

  _atom_site_aniso_U_11

  _atom_site_aniso_U_22

  _atom_site_aniso_U_33

  _atom_site_aniso_U_23

  _atom_site_aniso_U_13

  _atom_site_aniso_U_12

Ni2 0.0175(7) 0.0227(7) 0.0330(8) 0.0074(6) 0.0087(6) 0.0072(6)

Ni1 0.0280(8) 0.0372(9) 0.0346(9) 0.0015(7) 0.0045(7) 0.0113(7)

Mn1 0.0132(5) 0.0124(5) 0.0235(6) 0.0031(4) 0.0066(4) 0.0016(4)

S1 0.0427(13) 0.0448(13) 0.0432(13) 0.0018(10) 0.0142(11) 0.0143(11)

S2 0.0298(11) 0.0371(12) 0.0456(13) 0.0023(10) 0.0066(10) 0.0121(9)

S3 0.0276(10) 0.0219(10) 0.0350(11) 0.0076(8) 0.0107(9) 0.0113(8)

S4 0.0183(9) 0.0231(10) 0.0320(11) 0.0060(8) 0.0080(8) 0.0056(8)

O1 0.017(3) 0.035(3) 0.034(3) -0.011(2) 0.011(2) -0.009(2)

O2 0.023(3) 0.022(3) 0.084(4) 0.020(3) 0.005(3) 0.006(2)

O3 0.033(3) 0.029(3) 0.022(3) 0.004(2) 0.008(2) 0.014(2)

O4 0.029(3) 0.014(3) 0.070(4) 0.014(3) 0.009(3) -0.005(2)

O5 0.012(2) 0.023(3) 0.033(3) 0.006(2) 0.004(2) 0.006(2)

O303 0.029(3) 0.043(3) 0.057(4) 0.005(3) 0.015(3) 0.005(3)

O304 0.44(2) 0.146(11) 0.186(12) -0.031(9) 0.086(14) 0.028(13)

N1 0.018(3) 0.014(3) 0.021(3) 0.001(2) 0.002(2) 0.008(2)

N2 0.006(3) 0.014(3) 0.021(3) 0.000(2) 0.006(2) -0.003(2)

N3 0.016(3) 0.015(3) 0.021(3) 0.004(2) 0.006(2) 0.005(2)

N4 0.016(3) 0.010(3) 0.022(3) -0.004(2) 0.004(2) 0.002(2)

N5 0.050(5) 0.059(5) 0.073(6) -0.017(4) 0.022(4) 0.012(4)

N6 0.036(5) 0.052(5) 0.179(10) -0.024(6) 0.012(5) 0.016(4)

N7 0.040(4) 0.032(4) 0.040(4) 0.010(3) 0.018(3) 0.019(3)

N8 0.043(4) 0.026(4) 0.039(4) 0.004(3) 0.016(3) 0.003(3)

C1 0.006(3) 0.012(3) 0.020(4) 0.004(3) 0.003(3) -0.002(3)

C2 0.004(3) 0.024(4) 0.017(4) 0.001(3) 0.004(3) 0.002(3)

C3 0.014(3) 0.019(4) 0.018(4) 0.001(3) 0.003(3) -0.002(3)

C4 0.018(4) 0.019(4) 0.019(4) -0.004(3) 0.004(3) 0.003(3)

C5 0.016(4) 0.011(3) 0.025(4) 0.001(3) 0.001(3) 0.000(3)

C6 0.014(3) 0.010(3) 0.026(4) 0.008(3) 0.003(3) 0.004(3)

C7 0.012(3) 0.019(4) 0.025(4) 0.004(3) 0.004(3) 0.002(3)

C8 0.019(4) 0.016(4) 0.026(4) 0.005(3) 0.005(3) 0.000(3)

C9 0.031(4) 0.012(4) 0.031(4) 0.007(3) 0.010(3) 0.001(3)

C10 0.023(4) 0.027(4) 0.026(4) 0.006(3) 0.012(3) 0.004(3)

C11 0.012(3) 0.023(4) 0.018(4) 0.005(3) 0.007(3) 0.005(3)

C12 0.010(3) 0.021(4) 0.030(4) 0.004(3) 0.005(3) 0.002(3)

C13 0.015(4) 0.018(4) 0.023(4) 0.003(3) 0.007(3) 0.002(3)

C14 0.030(4) 0.031(4) 0.027(4) 0.003(3) 0.006(3) 0.016(4)

C15 0.022(4) 0.018(4) 0.032(4) 0.007(3) 0.003(3) 0.006(3)

C16 0.010(3) 0.010(3) 0.024(4) 0.001(3) 0.007(3) -0.003(3)

C17 0.006(3) 0.015(3) 0.025(4) 0.003(3) 0.005(3) -0.003(3)

C18 0.007(3) 0.010(3) 0.029(4) 0.006(3) 0.006(3) -0.003(3)

C19 0.015(4) 0.018(4) 0.025(4) 0.007(3) 0.004(3) 0.002(3)

C20 0.014(3) 0.018(4) 0.019(4) 0.001(3) 0.005(3) 0.000(3)

C21 0.016(4) 0.020(4) 0.023(4) 0.004(3) 0.001(3) 0.008(3)

C22 0.010(3) 0.017(3) 0.018(4) 0.000(3) 0.001(3) -0.001(3)

C23 0.014(3) 0.013(3) 0.022(4) -0.002(3) 0.002(3) 0.001(3)

C24 0.030(4) 0.025(4) 0.020(4) 0.000(3) 0.012(3) 0.013(3)

C25 0.014(3) 0.007(3) 0.028(4) -0.001(3) 0.007(3) 0.001(3)

C26 0.014(3) 0.011(3) 0.025(4) 0.004(3) 0.004(3) 0.001(3)

C27 0.017(4) 0.015(3) 0.031(4) 0.004(3) 0.009(3) 0.002(3)

C28 0.021(4) 0.024(4) 0.041(5) 0.002(3) 0.013(3) 0.003(3)

C29 0.028(4) 0.032(4) 0.046(5) 0.012(4) 0.012(4) 0.007(4)

C30 0.017(4) 0.023(4) 0.041(5) 0.001(3) 0.016(3) -0.002(3)

C31 0.025(4) 0.016(4) 0.025(4) -0.007(3) 0.001(3) 0.003(3)

C32 0.020(4) 0.022(4) 0.046(5) -0.012(4) 0.003(4) -0.008(3)

C33 0.026(4) 0.030(4) 0.049(5) -0.010(4) 0.007(4) 0.005(4)

C34 0.041(5) 0.025(4) 0.034(5) 0.000(4) 0.003(4) 0.007(4)

C41 0.018(4) 0.014(4) 0.028(4) 0.003(3) 0.007(3) 0.001(3)

C42 0.015(4) 0.022(4) 0.045(5) 0.005(3) 0.006(3) 0.000(3)

C43 0.016(4) 0.023(4) 0.041(5) 0.016(3) 0.006(3) 0.003(3)

C44 0.030(4) 0.015(4) 0.038(5) 0.009(3) 0.002(3) 0.010(3)

C45 0.027(4) 0.013(3) 0.023(4) 0.004(3) 0.004(3) 0.005(3)

C46 0.013(3) 0.015(3) 0.025(4) 0.006(3) 0.005(3) 0.001(3)

C47 0.019(4) 0.034(5) 0.076(6) 0.027(5) 0.004(4) 0.009(4)

C48 0.026(5) 0.061(6) 0.076(7) 0.033(5) -0.008(5) 0.002(4)

C49 0.043(6) 0.056(6) 0.119(9) 0.020(6) 0.010(6) 0.034(5)

C50 0.017(4) 0.059(6) 0.101(8) 0.038(5) -0.001(5) 0.010(4)

C51 0.020(4) 0.017(4) 0.034(4) 0.005(3) 0.001(3) -0.001(3)

C52 0.040(5) 0.018(4) 0.043(5) 0.000(4) 0.000(4) 0.002(4)

C53 0.032(4) 0.026(4) 0.039(5) 0.007(4) 0.011(4) 0.007(3)

C54 0.021(4) 0.017(4) 0.054(5) 0.008(4) 0.007(4) -0.002(3)

C61 0.014(3) 0.015(3) 0.024(4) 0.007(3) 0.009(3) 0.000(3)

C62 0.014(4) 0.014(3) 0.029(4) 0.005(3) 0.008(3) -0.003(3)

C63 0.019(4) 0.025(4) 0.022(4) 0.003(3) 0.000(3) 0.006(3)

C64 0.016(4) 0.016(4) 0.023(4) 0.001(3) 0.011(3) -0.006(3)

C65 0.016(4) 0.022(4) 0.018(4) 0.006(3) 0.008(3) 0.004(3)

C66 0.019(4) 0.019(4) 0.025(4) 0.009(3) 0.006(3) 0.000(3)

C67 0.022(4) 0.032(4) 0.024(4) 0.005(3) 0.003(3) 0.011(3)

C68 0.047(5) 0.056(6) 0.035(5) 0.011(4) 0.006(4) 0.036(5)

C69 0.054(5) 0.026(4) 0.033(5) 0.005(4) 0.004(4) 0.017(4)

C70 0.037(5) 0.041(5) 0.025(4) 0.002(4) -0.003(4) 0.015(4)

C71 0.042(5) 0.036(4) 0.026(4) 0.011(3) 0.015(4) 0.027(4)

C72 0.039(5) 0.034(4) 0.036(5) 0.013(4) 0.017(4) 0.019(4)

C73 0.053(5) 0.052(5) 0.041(5) 0.011(4) 0.018(4) 0.041(5)

C74 0.057(5) 0.020(4) 0.035(5) 0.007(4) 0.020(4) 0.014(4)

C81 0.017(4) 0.007(3) 0.030(4) 0.006(3) 0.009(3) 0.001(3)

C82 0.017(4) 0.010(3) 0.037(4) 0.005(3) 0.007(3) 0.001(3)

C83 0.025(4) 0.011(3) 0.031(4) 0.001(3) 0.010(3) 0.005(3)

C84 0.032(4) 0.014(4) 0.031(4) 0.007(3) 0.007(3) 0.006(3)

C85 0.022(4) 0.017(4) 0.026(4) 0.004(3) 0.007(3) 0.000(3)

C86 0.010(3) 0.022(4) 0.030(4) 0.003(3) 0.005(3) 0.008(3)

C87 0.022(4) 0.018(4) 0.048(5) 0.010(3) 0.008(4) 0.007(3)

C88 0.031(4) 0.025(4) 0.059(5) 0.015(4) 0.013(4) 0.015(4)

C89 0.038(5) 0.034(5) 0.111(8) -0.008(5) 0.015(5) 0.018(4)

C90 0.020(4) 0.063(6) 0.083(7) 0.052(5) 0.009(4) 0.004(4)

C91 0.020(4) 0.023(4) 0.027(4) 0.005(3) 0.008(3) -0.003(3)

C92 0.024(4) 0.039(5) 0.057(6) 0.003(4) -0.001(4) 0.001(4)

C93 0.023(4) 0.044(5) 0.045(5) 0.018(4) 0.011(4) -0.003(4)

C94 0.019(4) 0.036(5) 0.046(5) 0.008(4) -0.001(4) 0.001(4)

C95 0.045(6) 0.038(5) 0.055(6) -0.021(5) -0.001(5) 0.011(4)

C96 0.025(4) 0.039(5) 0.041(5) -0.011(4) 0.000(4) 0.000(4)

C97 0.029(4) 0.042(5) 0.041(5) -0.005(4) -0.002(4) 0.019(4)

C98 0.025(5) 0.056(6) 0.082(7) -0.013(6) 0.000(5) 0.013(5)

C99 0.021(4) 0.021(4) 0.034(5) 0.003(3) 0.005(3) 0.008(3)

C100 0.017(4) 0.023(4) 0.034(4) 0.009(3) 0.007(3) 0.005(3)

C101 0.017(4) 0.021(4) 0.027(4) -0.001(3) 0.002(3) 0.007(3)

C102 0.016(4) 0.026(4) 0.032(4) 0.008(4) 0.010(3) 0.001(3)

C301 0.041(5) 0.065(6) 0.060(6) 0.006(5) 0.014(5) 0.011(5)

C302 0.040(5) 0.038(5) 0.058(6) 0.016(4) -0.005(5) 0.000(4)


_geom_special_details

;

  All esds (except the esd in the dihedral angle between two l.s. planes)

  are estimated using the full covariance matrix.  The cell esds are taken

  into account individually in the estimation of esds in distances, angles

  and torsion angles; correlations between esds in cell parameters are only

  used when they are defined by crystal symmetry.  An approximate (isotropic)

  treatment of cell esds is used for estimating esds involving l.s. planes.

;


loop_

  _geom_bond_atom_site_label_1

  _geom_bond_atom_site_label_2

  _geom_bond_distance

  _geom_bond_site_symmetry_2

  _geom_bond_publ_flag

Ni2 S4 2.1501(17) . ?

Ni2 S4 2.1501(17) 2_666 ?

Ni2 S3 2.1662(18) 2_666 ?

Ni2 S3 2.1663(18) . ?

Ni1 S1 2.149(2) 2 ?

Ni1 S1 2.149(2) . ?

Ni1 S2 2.151(2) . ?

Ni1 S2 2.151(2) 2 ?

Mn1 N1 1.995(5) . ?

Mn1 N3 2.005(5) . ?

Mn1 N2 2.009(5) . ?

Mn1 N4 2.012(5) . ?

Mn1 O5 2.165(4) . ?

S1 C96 1.716(8) . ?

S2 C97 1.723(8) . ?

S3 C100 1.730(7) . ?

S4 C101 1.708(7) . ?

O1 C24 1.389(7) . ?

O2 C44 1.391(7) . ?

O3 C64 1.385(7) . ?

O4 C84 1.389(7) . ?

O303 C302 1.440(8) . ?

N1 C1 1.393(7) . ?

N1 C18 1.396(7) . ?

N2 C3 1.389(7) . ?

N2 C6 1.399(7) . ?

N3 C8 1.397(7) . ?

N3 C11 1.399(7) . ?

N4 C13 1.392(7) . ?

N4 C16 1.408(7) . ?

N5 C95 1.147(9) . ?

N6 C98 1.149(10) . ?

N7 C99 1.152(8) . ?

N8 C102 1.151(8) . ?

C1 C2 1.411(8) . ?

C1 C20 1.423(8) . ?

C2 C3 1.406(8) . ?

C2 C21 1.486(8) . ?

C3 C4 1.434(8) . ?

C4 C5 1.348(8) . ?

C5 C6 1.415(8) . ?

C6 C7 1.387(8) . ?

C7 C8 1.396(8) . ?

C7 C41 1.502(8) . ?

C8 C9 1.417(8) . ?

C9 C10 1.356(8) . ?

C10 C11 1.439(8) . ?

C11 C12 1.393(8) . ?

C12 C13 1.397(8) . ?

C12 C61 1.481(8) . ?

C13 C14 1.440(8) . ?

C14 C15 1.341(8) . ?

C15 C16 1.406(8) . ?

C16 C17 1.373(8) . ?

C17 C18 1.378(8) . ?

C17 C81 1.504(8) . ?

C18 C19 1.437(8) . ?

C19 C20 1.354(8) . ?

C21 C26 1.394(8) . ?

C21 C22 1.414(8) . ?

C22 C23 1.384(8) . ?

C23 C24 1.395(8) . ?

C23 C27 1.563(8) . ?

C24 C25 1.417(8) . ?

C25 C26 1.384(8) . ?

C25 C31 1.540(8) . ?

C27 C30 1.524(8) . ?

C27 C29 1.530(9) . ?

C27 C28 1.537(8) . ?

C31 C32 1.524(9) . ?

C31 C33 1.530(8) . ?

C31 C34 1.535(9) . ?

C41 C42 1.367(8) . ?

C41 C46 1.399(8) . ?

C42 C43 1.394(9) . ?

C43 C44 1.407(9) . ?

C43 C47 1.538(9) . ?

C44 C45 1.392(8) . ?

C45 C46 1.403(8) . ?

C45 C51 1.568(8) . ?

C47 C49 1.503(11) . ?

C47 C48 1.532(10) . ?

C47 C50 1.553(10) . ?

C51 C54 1.520(9) . ?

C51 C53 1.527(9) . ?

C51 C52 1.550(9) . ?

C61 C62 1.385(8) . ?

C61 C66 1.398(8) . ?

C62 C63 1.382(8) . ?

C63 C64 1.398(8) . ?

C63 C67 1.529(8) . ?

C64 C65 1.406(8) . ?

C65 C66 1.385(8) . ?

C65 C71 1.558(8) . ?

C67 C69 1.543(9) . ?

C67 C68 1.543(9) . ?

C67 C70 1.553(9) . ?

C71 C73 1.512(9) . ?

C71 C74 1.534(9) . ?

C71 C72 1.545(9) . ?

C81 C82 1.386(8) . ?

C81 C86 1.397(8) . ?

C82 C83 1.378(8) . ?

C83 C84 1.411(9) . ?

C83 C87 1.531(8) . ?

C84 C85 1.403(9) . ?

C85 C86 1.395(8) . ?

C85 C91 1.555(8) . ?

C87 C89 1.540(9) . ?

C87 C88 1.539(9) . ?

C87 C90 1.546(9) . ?

C91 C92 1.515(9) . ?

C91 C94 1.533(9) . ?

C91 C93 1.539(9) . ?

C95 C96 1.432(11) . ?

C96 C97 1.375(10) . ?

C97 C98 1.440(11) . ?

C99 C100 1.447(9) . ?

C100 C101 1.364(9) . ?

C101 C102 1.454(9) . ?

C301 C302 1.473(10) . ?


loop_

  _geom_angle_atom_site_label_1

  _geom_angle_atom_site_label_2

  _geom_angle_atom_site_label_3

  _geom_angle

  _geom_angle_site_symmetry_1

  _geom_angle_site_symmetry_3

  _geom_angle_publ_flag

S4 Ni2 S4 180.00(9) . 2_666 ?

S4 Ni2 S3 87.96(6) . 2_666 ?

S4 Ni2 S3 92.04(6) 2_666 2_666 ?

S4 Ni2 S3 92.04(6) . . ?

S4 Ni2 S3 87.96(6) 2_666 . ?

S3 Ni2 S3 179.997(1) 2_666 . ?

S1 Ni1 S1 180.00(9) 2 . ?

S1 Ni1 S2 87.29(8) 2 . ?

S1 Ni1 S2 92.71(8) . . ?

S1 Ni1 S2 92.71(8) 2 2 ?

S1 Ni1 S2 87.29(8) . 2 ?

S2 Ni1 S2 180.00(5) . 2 ?

N1 Mn1 N3 174.5(2) . . ?

N1 Mn1 N2 88.7(2) . . ?

N3 Mn1 N2 91.1(2) . . ?

N1 Mn1 N4 91.0(2) . . ?

N3 Mn1 N4 88.3(2) . . ?

N2 Mn1 N4 170.85(19) . . ?

N1 Mn1 O5 94.67(18) . . ?

N3 Mn1 O5 90.80(18) . . ?

N2 Mn1 O5 95.23(17) . . ?

N4 Mn1 O5 93.91(18) . . ?

C96 S1 Ni1 103.4(3) . . ?

C97 S2 Ni1 103.1(3) . . ?

C100 S3 Ni2 103.5(2) . . ?

C101 S4 Ni2 103.5(2) . . ?

C1 N1 C18 105.2(5) . . ?

C1 N1 Mn1 129.0(4) . . ?

C18 N1 Mn1 125.8(4) . . ?

C3 N2 C6 105.1(5) . . ?

C3 N2 Mn1 128.7(4) . . ?

C6 N2 Mn1 125.6(4) . . ?

C8 N3 C11 106.0(5) . . ?

C8 N3 Mn1 125.7(4) . . ?

C11 N3 Mn1 128.3(4) . . ?

C13 N4 C16 105.4(5) . . ?

C13 N4 Mn1 127.2(4) . . ?

C16 N4 Mn1 125.3(4) . . ?

N1 C1 C2 125.2(5) . . ?

N1 C1 C20 110.3(5) . . ?

C2 C1 C20 124.5(6) . . ?

C3 C2 C1 122.8(6) . . ?

C3 C2 C21 119.9(6) . . ?

C1 C2 C21 117.3(5) . . ?

N2 C3 C2 125.3(6) . . ?

N2 C3 C4 110.3(5) . . ?

C2 C3 C4 124.3(6) . . ?

C5 C4 C3 106.3(5) . . ?

C4 C5 C6 109.1(6) . . ?

C7 C6 N2 125.9(6) . . ?

C7 C6 C5 124.9(6) . . ?

N2 C6 C5 109.2(6) . . ?

C6 C7 C8 124.3(6) . . ?

C6 C7 C41 117.4(6) . . ?

C8 C7 C41 118.2(6) . . ?

C7 C8 N3 125.9(6) . . ?

C7 C8 C9 124.6(6) . . ?

N3 C8 C9 109.5(5) . . ?

C10 C9 C8 108.2(6) . . ?

C9 C10 C11 107.5(6) . . ?

C12 C11 N3 126.3(6) . . ?

C12 C11 C10 124.7(6) . . ?

N3 C11 C10 108.8(6) . . ?

C11 C12 C13 121.3(6) . . ?

C11 C12 C61 119.3(6) . . ?

C13 C12 C61 119.3(6) . . ?

N4 C13 C12 126.7(6) . . ?

N4 C13 C14 108.8(5) . . ?

C12 C13 C14 124.4(6) . . ?

C15 C14 C13 107.7(6) . . ?

C14 C15 C16 108.6(6) . . ?

C17 C16 C15 126.0(6) . . ?

C17 C16 N4 124.5(5) . . ?

C15 C16 N4 109.5(5) . . ?

C16 C17 C18 126.0(6) . . ?

C16 C17 C81 116.2(5) . . ?

C18 C17 C81 117.8(6) . . ?

C17 C18 N1 125.8(6) . . ?

C17 C18 C19 124.6(6) . . ?

N1 C18 C19 109.5(5) . . ?

C20 C19 C18 107.5(5) . . ?

C19 C20 C1 107.5(6) . . ?

C26 C21 C22 117.4(6) . . ?

C26 C21 C2 123.6(6) . . ?

C22 C21 C2 118.9(5) . . ?

C23 C22 C21 122.0(6) . . ?

C22 C23 C24 117.8(6) . . ?

C22 C23 C27 119.3(5) . . ?

C24 C23 C27 122.5(6) . . ?

O1 C24 C23 120.3(6) . . ?

O1 C24 C25 117.1(6) . . ?

C23 C24 C25 122.6(6) . . ?

C26 C25 C24 116.7(6) . . ?

C26 C25 C31 120.8(5) . . ?

C24 C25 C31 122.4(6) . . ?

C25 C26 C21 123.3(6) . . ?

C30 C27 C29 108.1(5) . . ?

C30 C27 C28 107.7(5) . . ?

C29 C27 C28 109.5(6) . . ?

C30 C27 C23 111.4(5) . . ?

C29 C27 C23 107.4(5) . . ?

C28 C27 C23 112.7(5) . . ?

C32 C31 C33 106.7(5) . . ?

C32 C31 C34 107.5(6) . . ?

C33 C31 C34 109.5(6) . . ?

C32 C31 C25 112.4(5) . . ?

C33 C31 C25 112.3(5) . . ?

C34 C31 C25 108.3(5) . . ?

C42 C41 C46 119.1(6) . . ?

C42 C41 C7 120.8(6) . . ?

C46 C41 C7 120.1(6) . . ?

C41 C42 C43 123.0(6) . . ?

C42 C43 C44 116.2(6) . . ?

C42 C43 C47 122.3(6) . . ?

C44 C43 C47 121.4(6) . . ?

O2 C44 C45 121.0(6) . . ?

O2 C44 C43 115.8(6) . . ?

C45 C44 C43 123.2(6) . . ?

C44 C45 C46 117.3(6) . . ?

C44 C45 C51 124.9(6) . . ?

C46 C45 C51 117.7(5) . . ?

C41 C46 C45 121.0(6) . . ?

C49 C47 C48 108.9(7) . . ?

C49 C47 C43 113.3(7) . . ?

C48 C47 C43 110.3(6) . . ?

C49 C47 C50 106.9(7) . . ?

C48 C47 C50 106.2(7) . . ?

C43 C47 C50 111.0(6) . . ?

C54 C51 C53 107.0(6) . . ?

C54 C51 C52 108.2(6) . . ?

C53 C51 C52 110.6(5) . . ?

C54 C51 C45 110.7(5) . . ?

C53 C51 C45 113.3(5) . . ?

C52 C51 C45 106.9(6) . . ?

C62 C61 C66 116.9(6) . . ?

C62 C61 C12 121.8(6) . . ?

C66 C61 C12 121.2(6) . . ?

C63 C62 C61 124.1(6) . . ?

C62 C63 C64 116.3(6) . . ?

C62 C63 C67 120.6(6) . . ?

C64 C63 C67 123.0(6) . . ?

O3 C64 C63 122.6(6) . . ?

O3 C64 C65 114.6(6) . . ?

C63 C64 C65 122.8(6) . . ?

C66 C65 C64 117.0(6) . . ?

C66 C65 C71 119.3(6) . . ?

C64 C65 C71 123.3(6) . . ?

C65 C66 C61 122.7(6) . . ?

C63 C67 C69 110.7(5) . . ?

C63 C67 C68 111.3(5) . . ?

C69 C67 C68 106.2(6) . . ?

C63 C67 C70 111.9(5) . . ?

C69 C67 C70 110.1(5) . . ?

C68 C67 C70 106.4(5) . . ?

C73 C71 C74 108.6(6) . . ?

C73 C71 C72 106.1(6) . . ?

C74 C71 C72 109.5(5) . . ?

C73 C71 C65 112.1(5) . . ?

C74 C71 C65 107.5(5) . . ?

C72 C71 C65 112.9(5) . . ?

C82 C81 C86 118.8(5) . . ?

C82 C81 C17 121.4(5) . . ?

C86 C81 C17 119.7(5) . . ?

C83 C82 C81 122.7(6) . . ?

C82 C83 C84 116.7(6) . . ?

C82 C83 C87 121.3(6) . . ?

C84 C83 C87 122.1(5) . . ?

O4 C84 C85 119.1(6) . . ?

O4 C84 C83 117.7(6) . . ?

C85 C84 C83 123.2(6) . . ?

C86 C85 C84 116.6(6) . . ?

C86 C85 C91 119.5(6) . . ?

C84 C85 C91 123.8(6) . . ?

C85 C86 C81 121.8(6) . . ?

C83 C87 C89 111.4(6) . . ?

C83 C87 C88 111.1(5) . . ?

C89 C87 C88 105.6(6) . . ?

C83 C87 C90 110.5(6) . . ?

C89 C87 C90 112.0(6) . . ?

C88 C87 C90 106.0(6) . . ?

C92 C91 C94 108.8(6) . . ?

C92 C91 C93 110.9(6) . . ?

C94 C91 C93 105.2(5) . . ?

C92 C91 C85 109.6(6) . . ?

C94 C91 C85 110.9(5) . . ?

C93 C91 C85 111.3(5) . . ?

N5 C95 C96 178.8(10) . . ?

C97 C96 C95 121.9(7) . . ?

C97 C96 S1 120.3(6) . . ?

C95 C96 S1 117.8(6) . . ?

C96 C97 C98 121.5(7) . . ?

C96 C97 S2 120.4(6) . . ?

C98 C97 S2 118.1(6) . . ?

N6 C98 C97 179.2(10) . . ?

N7 C99 C100 178.3(7) . . ?

C101 C100 C99 121.0(6) . . ?

C101 C100 S3 119.1(5) . . ?

C99 C100 S3 119.8(5) . . ?

C100 C101 C102 120.7(6) . . ?

C100 C101 S4 121.7(5) . . ?

C102 C101 S4 117.5(5) . . ?

N8 C102 C101 179.3(8) . . ?

O303 C302 C301 114.0(7) . . ?


_diffrn_measured_fraction_theta_max    0.988

_diffrn_reflns_theta_full              25.00

_diffrn_measured_fraction_theta_full   0.988

_refine_diff_density_max    1.047

_refine_diff_density_min   -0.735

_refine_diff_density_rms    0.097


#===END


data_jsm040

_audit_creation_method            SHELXL-97
_chemical_name_systematic
;
  ?
;
_chemical_name_common             ?
_chemical_melting_point           ?
_chemical_formula_moiety          ?
_chemical_formula_sum
  'C50 H30 Mn N6 Ni S4'
_chemical_formula_weight          956.69

loop_
  _atom_type_symbol
  _atom_type_description
  _atom_type_scat_dispersion_real
  _atom_type_scat_dispersion_imag
  _atom_type_scat_source
  'C'  'C'   0.0033   0.0016
  'International Tables Vol C Tables 4.2.6.8 and 6.1.1.4'
  'H'  'H'   0.0000   0.0000
  'International Tables Vol C Tables 4.2.6.8 and 6.1.1.4'
  'N'  'N'   0.0061   0.0033
  'International Tables Vol C Tables 4.2.6.8 and 6.1.1.4'
  'S'  'S'   0.1246   0.1234
  'International Tables Vol C Tables 4.2.6.8 and 6.1.1.4'
  'Ni'  'Ni'   0.3393   1.1124
  'International Tables Vol C Tables 4.2.6.8 and 6.1.1.4'
  'Mn'  'Mn'   0.3368   0.7283
  'International Tables Vol C Tables 4.2.6.8 and 6.1.1.4'

_symmetry_cell_setting            triclinic
_symmetry_space_group_name_H-M    P-1

loop_
  _symmetry_equiv_pos_as_xyz
  'x, y, z'
  '-x, -y, -z'

_cell_length_a                    10.6560(3)
_cell_length_b                    10.7154(4)
_cell_length_c                    10.8898(2)
_cell_angle_alpha                 97.8288(18)
_cell_angle_beta                  117.3550(16)
_cell_angle_gamma                 98.5935(15)
_cell_volume                      1061.86(5)
_cell_formula_units_Z             1
_cell_measurement_temperature     150(1)
_cell_measurement_reflns_used     3471
_cell_measurement_theta_min       1.018
_cell_measurement_theta_max       27.485

_exptl_crystal_description        prism
_exptl_crystal_colour             'dark red'
_exptl_crystal_size_max           0.25
_exptl_crystal_size_mid           0.23
_exptl_crystal_size_min           0.15
_exptl_crystal_density_meas       ?
_exptl_crystal_density_diffrn     1.496
_exptl_crystal_density_method     'not measured'
_exptl_crystal_F_000              489
_exptl_absorpt_coefficient_mu     0.982
_exptl_absorpt_correction_type    Multi-scan
_exptl_absorpt_correction_T_min   0.7913
_exptl_absorpt_correction_T_max   0.8667
_exptl_absorpt_process_details    'DENZO-SMN (Otwinowski & Minor, 1997)'

_exptl_special_details
;
   The program Denzo-SMN (Otwinowski & Minor, 1997) uses a scaling
  algorithm (Fox & Holmes, 1966) which effectively corrects for
  absorption effects. High redundancy data were used in the scaling
  program hence the 'multi-scan' code word was used. No transmission
  coefficients are available from the program (only scale factors for each
  frame). The scale factors in the experimental table are calculated
  from the 'size' command in the SHELXL-97 input file.
;

_diffrn_ambient_temperature       150(1)
_diffrn_radiation_wavelength      0.71073
_diffrn_radiation_type            MoK\a
_diffrn_radiation_source          'fine-focus sealed tube'
_diffrn_radiation_monochromator   graphite
_diffrn_measurement_device_type   'Nonius KappaCCD Diffractometer'
_diffrn_measurement_method        'Phi plus Omega scan'
_diffrn_detector_area_resol_mean  ?
_diffrn_standards_number          ?
_diffrn_standards_interval_count  ?
_diffrn_standards_interval_time   ?
_diffrn_standards_decay_%         ?
_diffrn_reflns_number             7577
_diffrn_reflns_av_R_equivalents   0.0240
_diffrn_reflns_av_sigmaI/netI     0.0409
_diffrn_reflns_limit_h_min        -13
_diffrn_reflns_limit_h_max        13
_diffrn_reflns_limit_k_min        -13
_diffrn_reflns_limit_k_max        13
_diffrn_reflns_limit_l_min        -14
_diffrn_reflns_limit_l_max        13
_diffrn_reflns_theta_min          3.26
_diffrn_reflns_theta_max          27.46
_reflns_number_total              4763
_reflns_number_gt                 4139
_reflns_threshold_expression      >2sigma(I)

_computing_data_collection        'Nonius COLLECT'
_computing_cell_refinement        DENZO-SMN
_computing_data_reduction         DENZO-SMN
_computing_structure_solution     SIR97
_computing_structure_refinement   'SHELXL-97 (Sheldrick, 1997)'
_computing_molecular_graphics     'WinGX, Ortep3'
_computing_publication_material   ?

_refine_special_details
;
  Refinement of F^2^ against ALL reflections.  The weighted R-factor wR and
  goodness of fit S are based on F^2^, conventional R-factors R are based
  on F, with F set to zero for negative F^2^. The threshold expression of
  F^2^ > 2sigma(F^2^) is used only for calculating R-factors(gt) etc. and is
  not relevant to the choice of reflections for refinement.  R-factors based
  on F^2^ are statistically about twice as large as those based on F, and R-
  factors based on ALL data will be even larger.
;

_refine_ls_structure_factor_coef  Fsqd
_refine_ls_matrix_type            full
_refine_ls_weighting_scheme       calc
_refine_ls_weighting_details
  'calc w=1/[\s^2^(Fo^2^)+(0.0191P)^2^+0.8352P] where P=(Fo^2^+2Fc^2^)/3'
_atom_sites_solution_primary      direct
_atom_sites_solution_secondary    difmap
_atom_sites_solution_hydrogens    geom
_refine_ls_hydrogen_treatment     mixed
_refine_ls_extinction_method      none
_refine_ls_extinction_coef        ?
_refine_ls_number_reflns          4763
_refine_ls_number_parameters      343
_refine_ls_number_restraints      0
_refine_ls_R_factor_all           0.0411
_refine_ls_R_factor_gt            0.0322
_refine_ls_wR_factor_ref          0.0768
_refine_ls_wR_factor_gt           0.0710
_refine_ls_goodness_of_fit_ref    1.054
_refine_ls_restrained_S_all       1.054
_refine_ls_shift/su_max           0.000
_refine_ls_shift/su_mean          0.000

loop_
  _atom_site_label
  _atom_site_type_symbol
  _atom_site_fract_x
  _atom_site_fract_y
  _atom_site_fract_z
  _atom_site_U_iso_or_equiv
  _atom_site_adp_type
  _atom_site_occupancy
  _atom_site_symmetry_multiplicity
  _atom_site_calc_flag
  _atom_site_refinement_flags
  _atom_site_disorder_assembly
  _atom_site_disorder_group
Mn1 Mn 0.0000 0.0000 1.0000 0.01351(9) Uani 1 2 d S . .
Ni1 Ni 0.0000 -0.5000 0.5000 0.01954(9) Uani 1 2 d S . .
S1 S -0.03062(5) -0.35300(5) 0.63037(5) 0.02833(13) Uani 1 1 d . . .
S2 S 0.22920(5) -0.46290(5) 0.64894(5) 0.02850(13) Uani 1 1 d . . .
N1 N 0.16133(16) 0.12497(14) 1.17837(14) 0.0155(3) Uani 1 1 d . . .
N2 N 0.01258(16) 0.12790(14) 0.88509(14) 0.0159(3) Uani 1 1 d . . .
N3 N 0.16063(18) -0.10310(16) 0.95951(16) 0.0231(3) Uani 1 1 d . . .
C1 C 0.22127(19) 0.10596(18) 1.31515(17) 0.0170(4) Uani 1 1 d . . .
C2 C 0.3340(2) 0.21888(18) 1.41178(19) 0.0200(4) Uani 1 1 d . . .
C3 C 0.3401(2) 0.30596(19) 1.33489(19) 0.0202(4) Uani 1 1 d . . .
C4 C 0.23138(19) 0.24848(17) 1.18927(18) 0.0167(4) Uani 1 1 d . . .
C5 C 0.20130(19) 0.31085(17) 1.07818(18) 0.0168(3) Uani 1 1 d . . .
C6 C 0.10074(19) 0.25226(17) 0.93623(18) 0.0172(4) Uani 1 1 d . . .
C7 C 0.0756(2) 0.31345(19) 0.82040(19) 0.0203(4) Uani 1 1 d . . .
C8 C -0.0267(2) 0.22618(19) 0.69929(19) 0.0204(4) Uani 1 1 d . . .
C9 C -0.06868(19) 0.11177(17) 0.73897(18) 0.0166(3) Uani 1 1 d . . .
C10 C -0.17787(19) 0.00265(17) 0.64468(17) 0.0165(4) Uani 1 1 d . . .
C11 C 0.27586(19) 0.45142(17) 1.11486(18) 0.0179(4) Uani 1 1 d . . .
C12 C 0.4080(2) 0.4910(2) 1.1202(2) 0.0297(5) Uani 1 1 d . . .
C13 C 0.4758(2) 0.6226(2) 1.1584(2) 0.0326(5) Uani 1 1 d . . .
C14 C 0.4100(2) 0.7143(2) 1.1888(2) 0.0268(4) Uani 1 1 d . . .
C15 C 0.2783(3) 0.6756(2) 1.1827(3) 0.0347(5) Uani 1 1 d . . .
C16 C 0.2111(2) 0.5444(2) 1.1466(2) 0.0313(5) Uani 1 1 d . . .
C17 C -0.25104(19) 0.00419(18) 0.48981(18) 0.0182(4) Uani 1 1 d . . .
C18 C -0.3593(2) 0.0708(2) 0.4347(2) 0.0262(4) Uani 1 1 d . . .
C19 C -0.4211(2) 0.0773(2) 0.2929(2) 0.0310(5) Uani 1 1 d . . .
C20 C -0.3732(2) 0.0179(2) 0.2069(2) 0.0307(5) Uani 1 1 d . . .
C21 C -0.2671(2) -0.0501(2) 0.2602(2) 0.0293(5) Uani 1 1 d . . .
C22 C -0.2064(2) -0.0582(2) 0.40192(19) 0.0239(4) Uani 1 1 d . . .
C23 C 0.1574(2) -0.18922(19) 0.88195(19) 0.0214(4) Uani 1 1 d . . .
C24 C 0.1421(2) -0.29478(19) 0.77677(19) 0.0218(4) Uani 1 1 d . . .
C25 C 0.2550(2) -0.3438(2) 0.7849(2) 0.0264(4) Uani 1 1 d . . .
H1 H 0.390(2) 0.226(2) 1.511(2) 0.023(5) Uiso 1 1 d . . .
H2 H 0.403(2) 0.391(2) 1.365(2) 0.028(6) Uiso 1 1 d . . .
H7 H 0.125(2) 0.398(2) 0.831(2) 0.021(5) Uiso 1 1 d . . .
H8 H -0.066(2) 0.239(2) 0.604(2) 0.022(5) Uiso 1 1 d . . .
H12 H 0.454(3) 0.428(3) 1.098(3) 0.050(8) Uiso 1 1 d . . .
H13 H 0.565(3) 0.648(3) 1.162(3) 0.048(8) Uiso 1 1 d . . .
H14 H 0.458(2) 0.804(2) 1.213(2) 0.031(6) Uiso 1 1 d . . .
H15 H 0.229(3) 0.735(3) 1.202(3) 0.054(8) Uiso 1 1 d . . .
H16 H 0.117(3) 0.518(3) 1.143(3) 0.043(7) Uiso 1 1 d . . .
H18 H -0.389(3) 0.113(2) 0.493(3) 0.035(6) Uiso 1 1 d . . .
H19 H -0.496(3) 0.124(3) 0.254(3) 0.044(7) Uiso 1 1 d . . .
H20 H -0.413(3) 0.026(2) 0.108(3) 0.039(7) Uiso 1 1 d . . .
H21 H -0.234(3) -0.092(3) 0.203(3) 0.040(7) Uiso 1 1 d . . .
H22 H -0.134(2) -0.105(2) 0.439(2) 0.026(6) Uiso 1 1 d . . .
H25 H 0.349(3) -0.310(3) 0.862(3) 0.041(7) Uiso 1 1 d . . .

loop_
  _atom_site_aniso_label
  _atom_site_aniso_U_11
  _atom_site_aniso_U_22
  _atom_site_aniso_U_33
  _atom_site_aniso_U_23
  _atom_site_aniso_U_13
  _atom_site_aniso_U_12
Mn1 0.01688(19) 0.01167(18) 0.01059(17) 0.00118(13) 0.00621(14) 0.00263(14)
Ni1 0.02181(18) 0.01977(18) 0.01966(17) 0.00269(13) 0.01184(14) 0.00820(13)
S1 0.0241(2) 0.0315(3) 0.0272(3) -0.0032(2) 0.0119(2) 0.0120(2)
S2 0.0237(2) 0.0307(3) 0.0278(3) -0.0030(2) 0.0110(2) 0.0121(2)
N1 0.0188(7) 0.0150(7) 0.0120(7) 0.0023(5) 0.0072(6) 0.0039(6)
N2 0.0197(7) 0.0134(7) 0.0130(7) 0.0018(5) 0.0076(6) 0.0023(6)
N3 0.0267(8) 0.0236(9) 0.0224(8) 0.0046(7) 0.0140(7) 0.0095(7)
C1 0.0187(9) 0.0171(9) 0.0135(8) 0.0015(7) 0.0067(7) 0.0056(7)
C2 0.0209(9) 0.0193(9) 0.0145(9) 0.0009(7) 0.0058(7) 0.0026(7)
C3 0.0198(9) 0.0170(9) 0.0175(9) 0.0010(7) 0.0060(7) 0.0009(7)
C4 0.0177(8) 0.0139(8) 0.0164(8) -0.0006(7) 0.0084(7) 0.0018(7)
C5 0.0176(8) 0.0157(9) 0.0165(8) 0.0023(7) 0.0084(7) 0.0035(7)
C6 0.0201(9) 0.0150(9) 0.0173(8) 0.0028(7) 0.0101(7) 0.0038(7)
C7 0.0251(9) 0.0173(9) 0.0193(9) 0.0062(7) 0.0115(8) 0.0032(8)
C8 0.0243(9) 0.0214(10) 0.0163(9) 0.0064(7) 0.0100(7) 0.0056(8)
C9 0.0199(9) 0.0179(9) 0.0137(8) 0.0044(7) 0.0090(7) 0.0062(7)
C10 0.0182(8) 0.0183(9) 0.0134(8) 0.0026(7) 0.0076(7) 0.0069(7)
C11 0.0199(9) 0.0152(9) 0.0144(8) 0.0033(7) 0.0056(7) 0.0020(7)
C12 0.0232(10) 0.0222(10) 0.0429(12) 0.0053(9) 0.0163(9) 0.0047(8)
C13 0.0218(10) 0.0253(11) 0.0448(13) 0.0055(9) 0.0145(9) -0.0020(8)
C14 0.0315(11) 0.0173(10) 0.0223(10) 0.0027(8) 0.0085(8) -0.0020(8)
C15 0.0428(13) 0.0191(11) 0.0489(14) 0.0028(9) 0.0292(11) 0.0071(9)
C16 0.0323(11) 0.0196(10) 0.0497(13) 0.0037(9) 0.0282(10) 0.0034(9)
C17 0.0199(9) 0.0168(9) 0.0145(8) 0.0035(7) 0.0067(7) 0.0008(7)
C18 0.0290(10) 0.0262(10) 0.0219(10) 0.0063(8) 0.0104(8) 0.0095(8)
C19 0.0301(11) 0.0308(12) 0.0231(10) 0.0126(9) 0.0039(9) 0.0079(9)
C20 0.0288(11) 0.0364(12) 0.0156(9) 0.0091(8) 0.0045(8) -0.0048(9)
C21 0.0277(11) 0.0395(12) 0.0170(9) 0.0031(8) 0.0117(8) -0.0010(9)
C22 0.0227(10) 0.0291(11) 0.0173(9) 0.0036(8) 0.0087(8) 0.0048(8)
C23 0.0210(9) 0.0246(10) 0.0225(9) 0.0083(8) 0.0123(8) 0.0083(8)
C24 0.0275(10) 0.0203(9) 0.0197(9) 0.0037(7) 0.0130(8) 0.0075(8)
C25 0.0248(10) 0.0253(11) 0.0248(10) 0.0005(8) 0.0098(8) 0.0075(8)

_geom_special_details
;
  All esds (except the esd in the dihedral angle between two l.s. planes)
  are estimated using the full covariance matrix.  The cell esds are taken
  into account individually in the estimation of esds in distances, angles
  and torsion angles; correlations between esds in cell parameters are only
  used when they are defined by crystal symmetry.  An approximate (isotropic)
  treatment of cell esds is used for estimating esds involving l.s. planes.
;

loop_
  _geom_bond_atom_site_label_1
  _geom_bond_atom_site_label_2
  _geom_bond_distance
  _geom_bond_site_symmetry_2
  _geom_bond_publ_flag
Mn1 N2 2.0071(15) 2_557 ?
Mn1 N2 2.0072(15) . ?
Mn1 N1 2.0140(14) 2_557 ?
Mn1 N1 2.0140(14) . ?
Mn1 N3 2.3390(16) . ?
Mn1 N3 2.3390(16) 2_557 ?
Ni1 S1 2.1385(5) 2_546 ?
Ni1 S1 2.1385(5) . ?
Ni1 S2 2.1558(5) 2_546 ?
Ni1 S2 2.1558(5) . ?
S1 C24 1.734(2) . ?
S2 C25 1.704(2) . ?
N1 C4 1.380(2) . ?
N1 C1 1.384(2) . ?
N2 C6 1.382(2) . ?
N2 C9 1.388(2) . ?
N3 C23 1.148(2) . ?
C1 C10 1.387(3) 2_557 ?
C1 C2 1.439(2) . ?
C2 C3 1.349(3) . ?
C2 H1 0.95(2) . ?
C3 C4 1.438(2) . ?
C3 H2 0.96(2) . ?
C4 C5 1.393(2) . ?
C5 C6 1.394(2) . ?
C5 C11 1.499(2) . ?
C6 C7 1.435(2) . ?
C7 C8 1.357(3) . ?
C7 H7 0.94(2) . ?
C8 C9 1.431(3) . ?
C8 H8 0.96(2) . ?
C9 C10 1.394(2) . ?
C10 C1 1.387(3) 2_557 ?
C10 C17 1.502(2) . ?
C11 C12 1.380(3) . ?
C11 C16 1.386(3) . ?
C12 C13 1.394(3) . ?
C12 H12 0.95(3) . ?
C13 C14 1.378(3) . ?
C13 H13 0.93(3) . ?
C14 C15 1.371(3) . ?
C14 H14 0.95(2) . ?
C15 C16 1.391(3) . ?
C15 H15 0.95(3) . ?
C16 H16 0.98(3) . ?
C17 C18 1.388(3) . ?
C17 C22 1.389(3) . ?
C18 C19 1.389(3) . ?
C18 H18 0.93(3) . ?
C19 C20 1.385(3) . ?
C19 H19 0.97(3) . ?
C20 C21 1.379(3) . ?
C20 H20 0.98(2) . ?
C21 C22 1.395(3) . ?
C21 H21 0.94(3) . ?
C22 H22 0.95(2) . ?
C23 C24 1.428(3) . ?
C24 C25 1.355(3) . ?
C25 H25 0.94(3) . ?

loop_
  _geom_angle_atom_site_label_1
  _geom_angle_atom_site_label_2
  _geom_angle_atom_site_label_3
  _geom_angle
  _geom_angle_site_symmetry_1
  _geom_angle_site_symmetry_3
  _geom_angle_publ_flag
N2 Mn1 N2 180.0 2_557 . ?
N2 Mn1 N1 90.13(6) 2_557 2_557 ?
N2 Mn1 N1 89.87(6) . 2_557 ?
N2 Mn1 N1 89.87(6) 2_557 . ?
N2 Mn1 N1 90.13(6) . . ?
N1 Mn1 N1 180.0 2_557 . ?
N2 Mn1 N3 88.10(6) 2_557 . ?
N2 Mn1 N3 91.90(6) . . ?
N1 Mn1 N3 86.85(6) 2_557 . ?
N1 Mn1 N3 93.15(6) . . ?
N2 Mn1 N3 91.90(6) 2_557 2_557 ?
N2 Mn1 N3 88.10(6) . 2_557 ?
N1 Mn1 N3 93.15(6) 2_557 2_557 ?
N1 Mn1 N3 86.85(6) . 2_557 ?
N3 Mn1 N3 180.00(7) . 2_557 ?
S1 Ni1 S1 180.00(2) 2_546 . ?
S1 Ni1 S2 92.469(19) 2_546 2_546 ?
S1 Ni1 S2 87.531(19) . 2_546 ?
S1 Ni1 S2 87.531(19) 2_546 . ?
S1 Ni1 S2 92.469(19) . . ?
S2 Ni1 S2 180.0 2_546 . ?
C24 S1 Ni1 102.75(7) . . ?
C25 S2 Ni1 103.70(7) . . ?
C4 N1 C1 106.14(14) . . ?
C4 N1 Mn1 126.81(11) . . ?
C1 N1 Mn1 127.03(12) . . ?
C6 N2 C9 105.81(14) . . ?
C6 N2 Mn1 126.88(11) . . ?
C9 N2 Mn1 127.27(12) . . ?
C23 N3 Mn1 139.39(15) . . ?
N1 C1 C10 125.95(16) . 2_557 ?
N1 C1 C2 109.41(16) . . ?
C10 C1 C2 124.62(16) 2_557 . ?
C3 C2 C1 107.43(16) . . ?
C3 C2 H1 129.3(13) . . ?
C1 C2 H1 123.3(13) . . ?
C2 C3 C4 107.34(16) . . ?
C2 C3 H2 129.5(13) . . ?
C4 C3 H2 123.1(13) . . ?
N1 C4 C5 126.02(15) . . ?
N1 C4 C3 109.66(15) . . ?
C5 C4 C3 124.32(17) . . ?
C4 C5 C6 123.95(17) . . ?
C4 C5 C11 117.81(15) . . ?
C6 C5 C11 118.16(16) . . ?
N2 C6 C5 125.99(16) . . ?
N2 C6 C7 109.83(15) . . ?
C5 C6 C7 124.17(17) . . ?
C8 C7 C6 107.17(17) . . ?
C8 C7 H7 128.8(12) . . ?
C6 C7 H7 124.0(13) . . ?
C7 C8 C9 107.45(16) . . ?
C7 C8 H8 126.8(13) . . ?
C9 C8 H8 125.7(13) . . ?
N2 C9 C10 125.56(16) . . ?
N2 C9 C8 109.69(15) . . ?
C10 C9 C8 124.72(16) . . ?
C1 C10 C9 124.28(16) 2_557 . ?
C1 C10 C17 118.72(15) 2_557 . ?
C9 C10 C17 116.99(16) . . ?
C12 C11 C16 119.01(18) . . ?
C12 C11 C5 122.09(17) . . ?
C16 C11 C5 118.89(17) . . ?
C11 C12 C13 120.4(2) . . ?
C11 C12 H12 120.0(17) . . ?
C13 C12 H12 119.5(17) . . ?
C14 C13 C12 120.1(2) . . ?
C14 C13 H13 120.4(18) . . ?
C12 C13 H13 119.5(18) . . ?
C15 C14 C13 119.73(19) . . ?
C15 C14 H14 121.8(14) . . ?
C13 C14 H14 118.5(15) . . ?
C14 C15 C16 120.4(2) . . ?
C14 C15 H15 122.7(18) . . ?
C16 C15 H15 116.9(18) . . ?
C11 C16 C15 120.3(2) . . ?
C11 C16 H16 119.7(16) . . ?
C15 C16 H16 120.0(16) . . ?
C18 C17 C22 119.70(17) . . ?
C18 C17 C10 120.75(17) . . ?
C22 C17 C10 119.51(17) . . ?
C17 C18 C19 120.3(2) . . ?
C17 C18 H18 120.3(15) . . ?
C19 C18 H18 119.3(15) . . ?
C20 C19 C18 119.6(2) . . ?
C20 C19 H19 119.4(15) . . ?
C18 C19 H19 121.0(15) . . ?
C21 C20 C19 120.48(18) . . ?
C21 C20 H20 119.5(15) . . ?
C19 C20 H20 120.0(15) . . ?
C20 C21 C22 120.0(2) . . ?
C20 C21 H21 122.0(16) . . ?
C22 C21 H21 118.1(16) . . ?
C17 C22 C21 119.8(2) . . ?
C17 C22 H22 119.5(13) . . ?
C21 C22 H22 120.6(13) . . ?
N3 C23 C24 175.2(2) . . ?
C25 C24 C23 123.18(18) . . ?
C25 C24 S1 121.02(15) . . ?
C23 C24 S1 115.72(14) . . ?
C24 C25 S2 120.03(16) . . ?
C24 C25 H25 121.0(16) . . ?
S2 C25 H25 118.9(16) . . ?

loop_
  _geom_torsion_atom_site_label_1
  _geom_torsion_atom_site_label_2
  _geom_torsion_atom_site_label_3
  _geom_torsion_atom_site_label_4
  _geom_torsion
  _geom_torsion_site_symmetry_1
  _geom_torsion_site_symmetry_2
  _geom_torsion_site_symmetry_3
  _geom_torsion_site_symmetry_4
  _geom_torsion_publ_flag
S1 Ni1 S1 C24 92(100) 2_546 . . . ?
S2 Ni1 S1 C24 178.85(7) 2_546 . . . ?
S2 Ni1 S1 C24 -1.15(7) . . . . ?
S1 Ni1 S2 C25 -178.48(8) 2_546 . . . ?
S1 Ni1 S2 C25 1.52(8) . . . . ?
S2 Ni1 S2 C25 -33(100) 2_546 . . . ?
N2 Mn1 N1 C4 -177.68(15) 2_557 . . . ?
N2 Mn1 N1 C4 2.32(15) . . . . ?
N1 Mn1 N1 C4 26.2(18) 2_557 . . . ?
N3 Mn1 N1 C4 94.24(15) . . . . ?
N3 Mn1 N1 C4 -85.76(15) 2_557 . . . ?
N2 Mn1 N1 C1 0.22(15) 2_557 . . . ?
N2 Mn1 N1 C1 -179.78(15) . . . . ?
N1 Mn1 N1 C1 -155.9(18) 2_557 . . . ?
N3 Mn1 N1 C1 -87.87(15) . . . . ?
N3 Mn1 N1 C1 92.13(15) 2_557 . . . ?
N2 Mn1 N2 C6 -47(29) 2_557 . . . ?
N1 Mn1 N2 C6 176.16(15) 2_557 . . . ?
N1 Mn1 N2 C6 -3.84(15) . . . . ?
N3 Mn1 N2 C6 -97.00(15) . . . . ?
N3 Mn1 N2 C6 83.00(15) 2_557 . . . ?
N2 Mn1 N2 C9 136(29) 2_557 . . . ?
N1 Mn1 N2 C9 -1.36(15) 2_557 . . . ?
N1 Mn1 N2 C9 178.64(15) . . . . ?
N3 Mn1 N2 C9 85.49(15) . . . . ?
N3 Mn1 N2 C9 -94.51(15) 2_557 . . . ?
N2 Mn1 N3 C23 86.3(2) 2_557 . . . ?
N2 Mn1 N3 C23 -93.7(2) . . . . ?
N1 Mn1 N3 C23 -3.9(2) 2_557 . . . ?
N1 Mn1 N3 C23 176.1(2) . . . . ?
N3 Mn1 N3 C23 87(32) 2_557 . . . ?
C4 N1 C1 C10 176.35(17) . . . 2_557 ?
Mn1 N1 C1 C10 -1.9(3) . . . 2_557 ?
C4 N1 C1 C2 -1.9(2) . . . . ?
Mn1 N1 C1 C2 179.89(12) . . . . ?
N1 C1 C2 C3 1.2(2) . . . . ?
C10 C1 C2 C3 -177.02(18) 2_557 . . . ?
C1 C2 C3 C4 -0.1(2) . . . . ?
C1 N1 C4 C5 -177.02(17) . . . . ?
Mn1 N1 C4 C5 1.2(3) . . . . ?
C1 N1 C4 C3 1.8(2) . . . . ?
Mn1 N1 C4 C3 -179.94(12) . . . . ?
C2 C3 C4 N1 -1.1(2) . . . . ?
C2 C3 C4 C5 177.78(18) . . . . ?
N1 C4 C5 C6 -4.6(3) . . . . ?
C3 C4 C5 C6 176.71(18) . . . . ?
N1 C4 C5 C11 171.98(17) . . . . ?
C3 C4 C5 C11 -6.7(3) . . . . ?
C9 N2 C6 C5 -179.99(17) . . . . ?
Mn1 N2 C6 C5 2.1(3) . . . . ?
C9 N2 C6 C7 -0.9(2) . . . . ?
Mn1 N2 C6 C7 -178.82(12) . . . . ?
C4 C5 C6 N2 2.9(3) . . . . ?
C11 C5 C6 N2 -173.71(17) . . . . ?
C4 C5 C6 C7 -176.12(18) . . . . ?
C11 C5 C6 C7 7.3(3) . . . . ?
N2 C6 C7 C8 -0.4(2) . . . . ?
C5 C6 C7 C8 178.70(18) . . . . ?
C6 C7 C8 C9 1.5(2) . . . . ?
C6 N2 C9 C10 -176.42(17) . . . . ?
Mn1 N2 C9 C10 1.5(3) . . . . ?
C6 N2 C9 C8 1.8(2) . . . . ?
Mn1 N2 C9 C8 179.76(12) . . . . ?
C7 C8 C9 N2 -2.1(2) . . . . ?
C7 C8 C9 C10 176.12(18) . . . . ?
N2 C9 C10 C1 0.4(3) . . . 2_557 ?
C8 C9 C10 C1 -177.63(18) . . . 2_557 ?
N2 C9 C10 C17 -179.06(16) . . . . ?
C8 C9 C10 C17 2.9(3) . . . . ?
C4 C5 C11 C12 90.8(2) . . . . ?
C6 C5 C11 C12 -92.4(2) . . . . ?
C4 C5 C11 C16 -88.1(2) . . . . ?
C6 C5 C11 C16 88.7(2) . . . . ?
C16 C11 C12 C13 0.6(3) . . . . ?
C5 C11 C12 C13 -178.31(19) . . . . ?
C11 C12 C13 C14 -1.1(3) . . . . ?
C12 C13 C14 C15 0.7(3) . . . . ?
C13 C14 C15 C16 0.3(3) . . . . ?
C12 C11 C16 C15 0.3(3) . . . . ?
C5 C11 C16 C15 179.3(2) . . . . ?
C14 C15 C16 C11 -0.8(4) . . . . ?
C1 C10 C17 C18 100.8(2) 2_557 . . . ?
C9 C10 C17 C18 -79.7(2) . . . . ?
C1 C10 C17 C22 -81.4(2) 2_557 . . . ?
C9 C10 C17 C22 98.1(2) . . . . ?
C22 C17 C18 C19 -1.2(3) . . . . ?
C10 C17 C18 C19 176.65(18) . . . . ?
C17 C18 C19 C20 -0.6(3) . . . . ?
C18 C19 C20 C21 1.5(3) . . . . ?
C19 C20 C21 C22 -0.6(3) . . . . ?
C18 C17 C22 C21 2.0(3) . . . . ?
C10 C17 C22 C21 -175.82(17) . . . . ?
C20 C21 C22 C17 -1.2(3) . . . . ?
Mn1 N3 C23 C24 28(3) . . . . ?
N3 C23 C24 C25 160(2) . . . . ?
N3 C23 C24 S1 -16(3) . . . . ?
Ni1 S1 C24 C25 0.44(19) . . . . ?
Ni1 S1 C24 C23 177.32(13) . . . . ?
C23 C24 C25 S2 -175.74(15) . . . . ?
S1 C24 C25 S2 0.9(3) . . . . ?
Ni1 S2 C25 C24 -1.7(2) . . . . ?

_diffrn_measured_fraction_theta_max    0.982
_diffrn_reflns_theta_full              27.46
_diffrn_measured_fraction_theta_full   0.982
_refine_diff_density_max    0.387
_refine_diff_density_min   -0.361
_refine_diff_density_rms    0.061

#===END


data_jsm76

_audit_creation_method            SHELXL-97
_chemical_name_systematic
;
  ?
;
_chemical_name_common             ?
_chemical_melting_point           ?
_chemical_formula_moiety          ?
_chemical_formula_sum
  'C52 H28 Mn N8 Ni S4'
_chemical_formula_weight          1006.71

loop_
  _atom_type_symbol
  _atom_type_description
  _atom_type_scat_dispersion_real
  _atom_type_scat_dispersion_imag
  _atom_type_scat_source
  'C'  'C'   0.0033   0.0016
  'International Tables Vol C Tables 4.2.6.8 and 6.1.1.4'
  'H'  'H'   0.0000   0.0000
  'International Tables Vol C Tables 4.2.6.8 and 6.1.1.4'
  'N'  'N'   0.0061   0.0033
  'International Tables Vol C Tables 4.2.6.8 and 6.1.1.4'
  'S'  'S'   0.1246   0.1234
  'International Tables Vol C Tables 4.2.6.8 and 6.1.1.4'
  'Mn'  'Mn'   0.3368   0.7283
  'International Tables Vol C Tables 4.2.6.8 and 6.1.1.4'
  'Ni'  'Ni'   0.3393   1.1124
  'International Tables Vol C Tables 4.2.6.8 and 6.1.1.4'

_symmetry_cell_setting            Triclinic
_symmetry_space_group_name_H-M    P-1

loop_
  _symmetry_equiv_pos_as_xyz
 'x, y, z' 
 '-x, -y, -z' 

_cell_length_a                    10.4769(9)
_cell_length_b                    10.8561(9)
_cell_length_c                    11.2213(9)
_cell_angle_alpha                 99.060(2)
_cell_angle_beta                  101.452(2)
_cell_angle_gamma                 113.5120(10)
_cell_volume                      1106.54(16)
_cell_formula_units_Z             1
_cell_measurement_temperature     218(2)
_cell_measurement_reflns_used     4558
_cell_measurement_theta_min       2.46
_cell_measurement_theta_max       28.26

_exptl_crystal_description        Block
_exptl_crystal_colour             Black
_exptl_crystal_size_max           0.40
_exptl_crystal_size_mid           0.15
_exptl_crystal_size_min           0.10
_exptl_crystal_density_meas       0
_exptl_crystal_density_diffrn     1.511
_exptl_crystal_density_method     'not measured'
_exptl_crystal_F_000              513
_exptl_absorpt_coefficient_mu     0.948
_exptl_absorpt_correction_type    'Multi-scan'
_exptl_absorpt_correction_T_min   0.768
_exptl_absorpt_correction_T_max   1.000
_exptl_absorpt_process_details    SADABS

_exptl_special_details
;
  ?
;

_diffrn_ambient_temperature       218(2)
_diffrn_radiation_wavelength      0.71073
_diffrn_radiation_type            MoK\a
_diffrn_radiation_source          'fine-focus sealed tube'
_diffrn_radiation_monochromator   graphite
_diffrn_measurement_device_type   'CCD area detector'
_diffrn_measurement_method        'phi and omega scans'
_diffrn_detector_area_resol_mean  ?
_diffrn_standards_number          ?
_diffrn_standards_interval_count  ?
_diffrn_standards_interval_time   ?
_diffrn_standards_decay_%         ?
_diffrn_reflns_number             8087
_diffrn_reflns_av_R_equivalents   0.0254
_diffrn_reflns_av_sigmaI/netI     0.0495
_diffrn_reflns_limit_h_min        -13
_diffrn_reflns_limit_h_max        13
_diffrn_reflns_limit_k_min        -14
_diffrn_reflns_limit_k_max        14
_diffrn_reflns_limit_l_min        -14
_diffrn_reflns_limit_l_max        13
_diffrn_reflns_theta_min          1.92
_diffrn_reflns_theta_max          28.26
_reflns_number_total              5028
_reflns_number_gt                 4034
_reflns_threshold_expression      >2sigma(I)

_computing_data_collection        'Bruker SMART'
_computing_cell_refinement        'Bruker SMART'
_computing_data_reduction         'Bruker SAINT'
"_computing_structure_solution     'SHELXS-97 (Sheldrick, 1990)' "
"_computing_structure_refinement   'SHELXL-97 (Sheldrick, 1997)' "
_computing_molecular_graphics     'Bruker SHELXTL'
_computing_publication_material   'Bruker SHELXTL'

_refine_special_details
;
  Refinement of F^2^ against ALL reflections.  The weighted R-factor wR and
" goodness of fit S are based on F^2^, conventional R-factors R are based "
" on F, with F set to zero for negative F^2^. The threshold expression of "
  F^2^ > 2sigma(F^2^) is used only for calculating R-factors(gt) etc. and is
  not relevant to the choice of reflections for refinement.  R-factors based
" on F^2^ are statistically about twice as large as those based on F, and R- "
  factors based on ALL data will be even larger.
;

_refine_ls_structure_factor_coef  Fsqd
_refine_ls_matrix_type            full
_refine_ls_weighting_scheme       calc
_refine_ls_weighting_details
  'calc w=1/[\s^2^(Fo^2^)+(0.0546P)^2^+0.7531P] where P=(Fo^2^+2Fc^2^)/3'
_atom_sites_solution_primary      direct
_atom_sites_solution_secondary    difmap
_atom_sites_solution_hydrogens    geom
_refine_ls_hydrogen_treatment     mixed
_refine_ls_extinction_method      none
_refine_ls_extinction_coef        ?
_refine_ls_number_reflns          5028
_refine_ls_number_parameters      301
_refine_ls_number_restraints      0
_refine_ls_R_factor_all           0.0570
_refine_ls_R_factor_gt            0.0435
_refine_ls_wR_factor_ref          0.1345
_refine_ls_wR_factor_gt           0.1092
_refine_ls_goodness_of_fit_ref    1.141
_refine_ls_restrained_S_all       1.141
_refine_ls_shift/su_max           0.000
_refine_ls_shift/su_mean          0.000

loop_
  _atom_site_label
  _atom_site_type_symbol
  _atom_site_fract_x
  _atom_site_fract_y
  _atom_site_fract_z
  _atom_site_U_iso_or_equiv
  _atom_site_adp_type
  _atom_site_occupancy
  _atom_site_symmetry_multiplicity
  _atom_site_calc_flag
  _atom_site_refinement_flags
  _atom_site_disorder_assembly
  _atom_site_disorder_group
Mn1 Mn 0.0000 0.0000 0.0000 0.02187(16) Uani 1 2 d S . .
Ni1 Ni 0.0000 0.5000 0.5000 0.03411(17) Uani 1 2 d S . .
S1 S 0.02764(9) 0.36990(9) 0.35372(9) 0.0440(2) Uani 1 1 d . . .
S2 S -0.22956(9) 0.37144(9) 0.44757(8) 0.0414(2) Uani 1 1 d . . .
N1 N 0.1571(3) 0.1735(2) 0.1253(2) 0.0232(5) Uani 1 1 d . . .
N2 N 0.0162(2) -0.1083(2) 0.1257(2) 0.0227(5) Uani 1 1 d . . .
N3 N -0.1605(3) 0.0552(3) 0.0982(3) 0.0356(6) Uani 1 1 d . . .
N4 N -0.5229(3) 0.0598(3) 0.2124(3) 0.0450(7) Uani 1 1 d . . .
C1 C 0.2147(3) 0.3049(3) 0.1069(3) 0.0264(6) Uani 1 1 d . . .
C2 C 0.3260(3) 0.4006(3) 0.2189(3) 0.0315(7) Uani 1 1 d . . .
H2A H 0.3837 0.4960 0.2301 0.038 Uiso 1 1 calc R . .
C3 C 0.3324(3) 0.3282(3) 0.3049(3) 0.0308(7) Uani 1 1 d . . .
H3B H 0.3948 0.3640 0.3877 0.037 Uiso 1 1 calc R . .
C4 C 0.2271(3) 0.1868(3) 0.2474(3) 0.0256(6) Uani 1 1 d . . .
C5 C 0.1997(3) 0.0815(3) 0.3085(3) 0.0275(6) Uani 1 1 d . . .
C6 C 0.1051(3) -0.0576(3) 0.2482(3) 0.0262(6) Uani 1 1 d . . .
C7 C 0.0849(3) -0.1693(3) 0.3059(3) 0.0311(7) Uani 1 1 d . . .
H7A H 0.1326 -0.1621 0.3889 0.037 Uiso 1 1 calc R . .
C8 C -0.0153(3) -0.2871(3) 0.2192(3) 0.0308(7) Uani 1 1 d . . .
H8A H -0.0494 -0.3775 0.2304 0.037 Uiso 1 1 calc R . .
C9 C -0.0602(3) -0.2500(3) 0.1077(3) 0.0266(6) Uani 1 1 d . . .
C10 C -0.1701(3) -0.3424(3) 0.0005(3) 0.0270(6) Uani 1 1 d . . .
C11 C 0.2697(3) 0.1191(3) 0.4467(3) 0.0293(6) Uani 1 1 d . . .
C12 C 0.1967(6) 0.1424(7) 0.5286(4) 0.089(2) Uani 1 1 d . . .
H12A H 0.1029 0.1345 0.4971 0.107 Uiso 1 1 calc R . .
C13 C 0.2585(7) 0.1775(8) 0.6571(4) 0.108(3) Uani 1 1 d . . .
H13A H 0.2055 0.1913 0.7121 0.130 Uiso 1 1 calc R . .
C14 C 0.3942(5) 0.1923(4) 0.7046(3) 0.0527(10) Uani 1 1 d . . .
H14A H 0.4373 0.2196 0.7922 0.063 Uiso 1 1 calc R . .
C15 C 0.4667(4) 0.1676(5) 0.6257(3) 0.0572(11) Uani 1 1 d . . .
H15A H 0.5602 0.1748 0.6577 0.069 Uiso 1 1 calc R . .
C16 C 0.4041(4) 0.1313(5) 0.4972(3) 0.0581(11) Uani 1 1 d . . .
H16A H 0.4565 0.1146 0.4429 0.070 Uiso 1 1 calc R . .
C17 C -0.2432(3) -0.4918(3) 0.0012(3) 0.0260(6) Uani 1 1 d . . .
C18 C -0.2043(3) -0.5872(3) -0.0596(3) 0.0306(6) Uani 1 1 d . . .
H18A H -0.1321 -0.5576 -0.1010 0.037 Uiso 1 1 calc R . .
C19 C -0.2716(3) -0.7257(3) -0.0593(3) 0.0316(7) Uani 1 1 d . . .
H19A H -0.2449 -0.7903 -0.1001 0.038 Uiso 1 1 calc R . .
C20 C -0.3777(3) -0.7686(3) 0.0008(3) 0.0334(7) Uani 1 1 d . . .
H20A H -0.4234 -0.8627 0.0009 0.040 Uiso 1 1 calc R . .
C21 C -0.4178(4) -0.6748(3) 0.0611(3) 0.0364(7) Uani 1 1 d . . .
H21A H -0.4910 -0.7049 0.1013 0.044 Uiso 1 1 calc R . .
C22 C -0.3488(4) -0.5358(3) 0.0617(3) 0.0333(7) Uani 1 1 d . . .
H22A H -0.3745 -0.4712 0.1037 0.040 Uiso 1 1 calc R . .
C23 C -0.1595(3) 0.1338(3) 0.1787(3) 0.0313(6) Uani 1 1 d . . .
C24 C -0.1450(4) 0.2394(3) 0.2825(3) 0.0332(7) Uani 1 1 d . . .
C25 C -0.2577(3) 0.2399(3) 0.3227(3) 0.0307(6) Uani 1 1 d . . .
C26 C -0.4048(4) 0.1383(3) 0.2616(3) 0.0335(7) Uani 1 1 d . . .

loop_
  _atom_site_aniso_label
  _atom_site_aniso_U_11
  _atom_site_aniso_U_22
  _atom_site_aniso_U_33
  _atom_site_aniso_U_23
  _atom_site_aniso_U_13
  _atom_site_aniso_U_12
Mn1 0.0277(3) 0.0198(3) 0.0160(3) 0.0025(2) 0.0026(2) 0.0110(2)
Ni1 0.0306(3) 0.0342(3) 0.0309(3) -0.0044(2) 0.0075(2) 0.0134(2)
S1 0.0314(4) 0.0464(5) 0.0429(5) -0.0117(4) 0.0097(4) 0.0154(4)
S2 0.0333(4) 0.0407(4) 0.0390(5) -0.0086(3) 0.0128(4) 0.0113(3)
N1 0.0277(12) 0.0250(10) 0.0176(11) 0.0049(9) 0.0051(9) 0.0133(9)
N2 0.0273(12) 0.0233(10) 0.0175(11) 0.0043(8) 0.0044(9) 0.0124(9)
N3 0.0408(16) 0.0362(13) 0.0312(14) 0.0036(11) 0.0073(12) 0.0220(12)
N4 0.0456(18) 0.0379(14) 0.0394(16) 0.0013(12) 0.0160(14) 0.0084(13)
C1 0.0293(15) 0.0236(12) 0.0236(14) 0.0029(10) 0.0046(12) 0.0118(11)
C2 0.0329(16) 0.0263(13) 0.0263(15) 0.0022(11) 0.0028(13) 0.0086(12)
C3 0.0313(16) 0.0291(13) 0.0229(14) 0.0010(11) -0.0008(12) 0.0107(12)
C4 0.0287(15) 0.0270(13) 0.0188(13) 0.0014(10) 0.0035(11) 0.0133(11)
C5 0.0323(16) 0.0296(13) 0.0181(13) 0.0043(10) 0.0015(11) 0.0146(12)
C6 0.0316(15) 0.0292(13) 0.0195(13) 0.0050(10) 0.0056(12) 0.0166(12)
C7 0.0385(17) 0.0330(14) 0.0222(14) 0.0095(11) 0.0035(13) 0.0180(13)
C8 0.0396(17) 0.0261(13) 0.0271(15) 0.0099(11) 0.0060(13) 0.0155(12)
C9 0.0335(16) 0.0227(12) 0.0239(14) 0.0055(10) 0.0066(12) 0.0139(11)
C10 0.0333(16) 0.0225(12) 0.0240(14) 0.0056(10) 0.0071(12) 0.0120(11)
C11 0.0348(16) 0.0287(13) 0.0198(14) 0.0036(11) 0.0025(12) 0.0132(12)
C12 0.079(3) 0.186(6) 0.027(2) 0.004(3) 0.002(2) 0.100(4)
C13 0.108(4) 0.233(8) 0.022(2) 0.006(3) 0.010(2) 0.129(5)
C14 0.067(3) 0.068(2) 0.0211(17) 0.0039(16) -0.0009(17) 0.037(2)
C15 0.038(2) 0.098(3) 0.0295(19) 0.0173(19) 0.0005(16) 0.028(2)
C16 0.039(2) 0.103(3) 0.0258(18) 0.0163(19) 0.0045(16) 0.028(2)
C17 0.0302(15) 0.0234(12) 0.0226(14) 0.0055(10) 0.0036(11) 0.0123(11)
C18 0.0322(16) 0.0271(13) 0.0300(16) 0.0066(11) 0.0077(13) 0.0115(12)
C19 0.0367(17) 0.0260(13) 0.0309(16) 0.0029(11) 0.0064(13) 0.0159(12)
C20 0.0389(17) 0.0244(13) 0.0298(16) 0.0086(11) 0.0039(13) 0.0092(12)
C21 0.0371(18) 0.0385(16) 0.0360(18) 0.0144(13) 0.0140(14) 0.0159(14)
C22 0.0403(18) 0.0328(14) 0.0323(16) 0.0091(12) 0.0131(14) 0.0202(13)
C23 0.0300(16) 0.0325(14) 0.0303(16) 0.0053(12) 0.0069(13) 0.0149(12)
C24 0.0343(17) 0.0330(14) 0.0276(16) 0.0026(12) 0.0040(13) 0.0147(13)
C25 0.0348(16) 0.0305(14) 0.0262(15) 0.0006(11) 0.0110(13) 0.0155(12)
C26 0.0425(19) 0.0320(14) 0.0275(15) 0.0054(12) 0.0157(14) 0.0161(14)

_geom_special_details
;
  All esds (except the esd in the dihedral angle between two l.s. planes)
  are estimated using the full covariance matrix.  The cell esds are taken
" into account individually in the estimation of esds in distances, angles "
  and torsion angles; correlations between esds in cell parameters are only
  used when they are defined by crystal symmetry.  An approximate (isotropic)
  treatment of cell esds is used for estimating esds involving l.s. planes.
;

loop_
  _geom_bond_atom_site_label_1
  _geom_bond_atom_site_label_2
  _geom_bond_distance
  _geom_bond_site_symmetry_2
  _geom_bond_publ_flag
Mn1 N2 1.996(2) . ?
Mn1 N2 1.996(2) 2 ?
Mn1 N1 2.002(2) . ?
Mn1 N1 2.002(2) 2 ?
Mn1 N3 2.394(3) . ?
Mn1 N3 2.394(3) 2 ?
Ni1 S1 2.1350(8) 2_566 ?
Ni1 S1 2.1350(8) . ?
Ni1 S2 2.1400(9) 2_566 ?
Ni1 S2 2.1400(9) . ?
S1 C24 1.715(3) . ?
S2 C25 1.720(3) . ?
N1 C4 1.375(3) . ?
N1 C1 1.377(3) . ?
N2 C9 1.379(3) . ?
N2 C6 1.381(3) . ?
N3 C23 1.136(4) . ?
N4 C26 1.141(4) . ?
C1 C10 1.386(4) 2 ?
C1 C2 1.435(4) . ?
C2 C3 1.345(4) . ?
C2 H2A 0.9400 . ?
C3 C4 1.430(4) . ?
C3 H3B 0.9400 . ?
C4 C5 1.386(4) . ?
C5 C6 1.392(4) . ?
C5 C11 1.491(4) . ?
C6 C7 1.425(4) . ?
C7 C8 1.347(4) . ?
C7 H7A 0.9400 . ?
C8 C9 1.423(4) . ?
C8 H8A 0.9400 . ?
C9 C10 1.388(4) . ?
C10 C1 1.386(4) 2 ?
C10 C17 1.494(4) . ?
C11 C16 1.353(5) . ?
C11 C12 1.361(5) . ?
C12 C13 1.380(6) . ?
C12 H12A 0.9400 . ?
C13 C14 1.350(6) . ?
C13 H13A 0.9400 . ?
C14 C15 1.337(6) . ?
C14 H14A 0.9400 . ?
C15 C16 1.380(5) . ?
C15 H15A 0.9400 . ?
C16 H16A 0.9400 . ?
C17 C22 1.375(4) . ?
C17 C18 1.389(4) . ?
C18 C19 1.384(4) . ?
C18 H18A 0.9400 . ?
C19 C20 1.375(5) . ?
C19 H19A 0.9400 . ?
C20 C21 1.381(5) . ?
C20 H20A 0.9400 . ?
C21 C22 1.388(4) . ?
C21 H21A 0.9400 . ?
C22 H22A 0.9400 . ?
C23 C24 1.436(4) . ?
C24 C25 1.347(4) . ?
C25 C26 1.431(4) . ?

loop_
  _geom_angle_atom_site_label_1
  _geom_angle_atom_site_label_2
  _geom_angle_atom_site_label_3
  _geom_angle
  _geom_angle_site_symmetry_1
  _geom_angle_site_symmetry_3
  _geom_angle_publ_flag
N2 Mn1 N2 180.00(11) . 2 ?
N2 Mn1 N1 89.63(9) . . ?
N2 Mn1 N1 90.37(9) 2 . ?
N2 Mn1 N1 90.37(9) . 2 ?
N2 Mn1 N1 89.63(9) 2 2 ?
N1 Mn1 N1 180.00(19) . 2 ?
N2 Mn1 N3 87.12(9) . . ?
N2 Mn1 N3 92.88(9) 2 . ?
N1 Mn1 N3 84.83(9) . . ?
N1 Mn1 N3 95.17(9) 2 . ?
N2 Mn1 N3 92.88(9) . 2 ?
N2 Mn1 N3 87.12(9) 2 2 ?
N1 Mn1 N3 95.17(9) . 2 ?
N1 Mn1 N3 84.83(9) 2 2 ?
N3 Mn1 N3 180.00(12) . 2 ?
S1 Ni1 S1 180.0 2_566 . ?
S1 Ni1 S2 92.45(3) 2_566 2_566 ?
S1 Ni1 S2 87.55(3) . 2_566 ?
S1 Ni1 S2 87.55(3) 2_566 . ?
S1 Ni1 S2 92.45(3) . . ?
S2 Ni1 S2 180.0 2_566 . ?
C24 S1 Ni1 103.36(11) . . ?
C25 S2 Ni1 103.31(11) . . ?
C4 N1 C1 106.1(2) . . ?
C4 N1 Mn1 127.33(18) . . ?
C1 N1 Mn1 126.60(18) . . ?
C9 N2 C6 105.7(2) . . ?
C9 N2 Mn1 126.88(18) . . ?
C6 N2 Mn1 127.42(18) . . ?
C23 N3 Mn1 141.4(3) . . ?
N1 C1 C10 126.1(2) . 2 ?
N1 C1 C2 109.5(2) . . ?
C10 C1 C2 124.3(3) 2 . ?
C3 C2 C1 107.2(2) . . ?
C3 C2 H2A 126.4 . . ?
C1 C2 H2A 126.4 . . ?
C2 C3 C4 107.5(3) . . ?
C2 C3 H3B 126.2 . . ?
C4 C3 H3B 126.2 . . ?
N1 C4 C5 126.1(2) . . ?
N1 C4 C3 109.7(2) . . ?
C5 C4 C3 124.2(3) . . ?
C4 C5 C6 123.3(3) . . ?
C4 C5 C11 118.7(2) . . ?
C6 C5 C11 117.9(3) . . ?
N2 C6 C5 125.8(3) . . ?
N2 C6 C7 109.8(2) . . ?
C5 C6 C7 124.4(3) . . ?
C8 C7 C6 107.2(3) . . ?
C8 C7 H7A 126.4 . . ?
C6 C7 H7A 126.4 . . ?
C7 C8 C9 107.7(3) . . ?
C7 C8 H8A 126.2 . . ?
C9 C8 H8A 126.2 . . ?
N2 C9 C10 125.8(3) . . ?
N2 C9 C8 109.6(2) . . ?
C10 C9 C8 124.5(3) . . ?
C1 C10 C9 124.1(3) 2 . ?
C1 C10 C17 118.3(2) 2 . ?
C9 C10 C17 117.6(2) . . ?
C16 C11 C12 117.1(3) . . ?
C16 C11 C5 123.5(3) . . ?
C12 C11 C5 119.5(3) . . ?
C11 C12 C13 120.9(4) . . ?
C11 C12 H12A 119.5 . . ?
C13 C12 H12A 119.5 . . ?
C14 C13 C12 120.6(4) . . ?
C14 C13 H13A 119.7 . . ?
C12 C13 H13A 119.7 . . ?
C15 C14 C13 119.3(4) . . ?
C15 C14 H14A 120.3 . . ?
C13 C14 H14A 120.3 . . ?
C14 C15 C16 119.9(4) . . ?
C14 C15 H15A 120.1 . . ?
C16 C15 H15A 120.1 . . ?
C11 C16 C15 122.2(4) . . ?
C11 C16 H16A 118.9 . . ?
C15 C16 H16A 118.9 . . ?
C22 C17 C18 119.6(3) . . ?
C22 C17 C10 120.6(3) . . ?
C18 C17 C10 119.8(3) . . ?
C19 C18 C17 120.1(3) . . ?
C19 C18 H18A 119.9 . . ?
C17 C18 H18A 119.9 . . ?
C20 C19 C18 119.7(3) . . ?
C20 C19 H19A 120.2 . . ?
C18 C19 H19A 120.2 . . ?
C19 C20 C21 120.7(3) . . ?
C19 C20 H20A 119.6 . . ?
C21 C20 H20A 119.6 . . ?
C20 C21 C22 119.3(3) . . ?
C20 C21 H21A 120.3 . . ?
C22 C21 H21A 120.3 . . ?
C17 C22 C21 120.5(3) . . ?
C17 C22 H22A 119.7 . . ?
C21 C22 H22A 119.7 . . ?
N3 C23 C24 175.0(3) . . ?
C25 C24 C23 123.5(3) . . ?
C25 C24 S1 120.7(2) . . ?
C23 C24 S1 115.8(2) . . ?
C24 C25 C26 122.8(3) . . ?
C24 C25 S2 120.2(2) . . ?
C26 C25 S2 116.9(2) . . ?
N4 C26 C25 178.4(4) . . ?

_diffrn_measured_fraction_theta_max    0.918
_diffrn_reflns_theta_full              28.26
_diffrn_measured_fraction_theta_full   0.918
_refine_diff_density_max    0.473
_refine_diff_density_min   -0.463
_refine_diff_density_rms    0.086

#===END
